# Supplementary material for: In Silico Identification of Potential Natural Product Inhibitors of Human Proteases Key to SARS-CoV-2 Infection
Source: Molecules. 2020 Aug 22;25(17):3822. doi: 10.3390/molecules25173822 (PMC7504347; doi:10.3390/molecules25173822)
Supplement: Supplementary file 1 [file molecules-25-03822-s001.zip › SITables_VivekAnanth_Molecules.xlsx]

## Sheet: Summary
Supplementary Tables S1-S7 for In silico identification of potential natural product inhibitors of human proteases key to SARS-CoV-2 infection R.P. Vivek-Ananth1,2, Abhijit Rana2,3, Nithin Rajan1, Himansu S. Biswal2,3,*, Areejit Samal1,2,*,$ 1The Institute of Mathematical Sciences (IMSc), Chennai 600113, India 2Homi Bhabha National Institute (HBNI), Mumbai 400094, India 3School of Chemical Scienc…

## Sheet: Table S1
Table S1: Top list of 96 phytochemical inhibitors of TMPRSS2. For each phytochemical, the table gives the symbol, docked binding energy, Pubchem identifier, common name, IUPAC name and SMILES.
Phytochemical symbol	Binding energy (kcal/mol)	PubChem identifier	Common name	IUPAC name	SMILES
T1	-9.6	CID5320815	Qingdainone	(6Z)-6-(3-oxo-1H-indol-2-ylidene)indolo[2,1-b]quinazolin-12-one	O=C1c2ccccc2N/C/1=c/1\c2nc3ccccc3c(=O)n2c2c1cccc2
T2	-9.6	CID101835682	Edgeworoside C	7-hydroxy-8-[2-oxo-7-[(2S,3R,4R,5R,6S)-3,4,5-trihydroxy-6-methyloxan-2-yl]oxychromen-8-yl]chromen-2-one	O=c1ccc2c(o1)c(c(cc2)O[C@@H]1O[C@@H](C)[C@@H]([C@H]([C@H]1O)O)O)c1c(O)ccc2c1oc(=O)cc2
T3	-9.6	CID120734	Adlumidine	(6S)-6-[(5S)-6-methyl-7,8-dihydro-5H-[1,3]dioxolo[4,5-g]isoquinolin-5-yl]-6H-furo[3,4-g][1,3]benzodioxol-8-one	CN1CCc2c([C@H]1[C@H]1OC(=O)c3c1ccc1c3OCO1)cc1c(c2)OCO1
T4	-9.3	CID102067318	Pseudo-alpha-Colubrine	(4aR,5aR,8aS,13aS,15aS,15bR)-5a-hydroxy-11-methoxy-2,4a,5,7,8,13a,15,15a,15b,16-decahydro4,6-methanoindolo[3,2,1-ij]oxepino[2,3,4-de]pyrrolo[2,3-h]quinolin-14-one	COc1ccc2c(c1)N1C(=O)C[C@H]3[C@H]4[C@H]1[C@@]12CCN2[C@@]1(O)C[C@H]4C(=CCO3)C2
T5	-9.3	CID10237	Bicuculline	(6R)-6-[(5S)-6-methyl-7,8-dihydro-5H-[1,3]dioxolo[4,5-g]isoquinolin-5-yl]-6H-furo[3,4-g][1,3]benzodioxol-8-one	CN1CCc2c([C@H]1[C@@H]1OC(=O)c3c1ccc1c3OCO1)cc1c(c2)OCO1
T6	-9.3	CID73393	Strychnine N-oxide	(4aR,5aS,8aS,13aS,15aS,15bR)-6-oxido-4a,5,5a,7,8,13a,15,15a,15b,16-decahydro-2H-4,6-methanoindolo[3,2,1-ij]oxepino[2,3,4-de]pyrrolo[2,3-h]quinolin-6-ium-14-one	O=C1C[C@@H]2OCC=C3[C@H]4[C@@H]2[C@@H]2N1c1ccccc1[C@]12CC[N@+]([C@H]1C4)(C3)[O-]
T7	-9.2	CID12303796	alpha-Colubrine	(4aR,5aS,8aR,13aS,15aS,15bR)-11-methoxy-4a,5,5a,7,8,13a,15,15a,15b,16-decahydro-2H-4,6-methanoindolo[3,2,1-ij]oxepino[2,3,4-de]pyrrolo[2,3-h]quinolin-14-one	COc1ccc2c(c1)N1C(=O)C[C@H]3[C@H]4[C@H]1[C@@]12CCN2[C@H]1C[C@H]4C(=CCO3)C2
T8	-9.2	CID189685	Egenine	(6R,8S)-6-[(5S)-6-methyl-7,8-dihydro-5H-[1,3]dioxolo[4,5-g]isoquinolin-5-yl]-6,8-dihydrofuro[3,4-g][1,3]benzodioxol-8-ol	CN1CCc2c([C@H]1[C@@H]1O[C@@H](c3c1ccc1c3OCO1)O)cc1c(c2)OCO1
T9	-9.2	CID21680050	2-Hydroxy-3-methoxystrychnine	(4aR,5aS,8aR,13aS,15aS,15bR)-10-hydroxy-11-methoxy-4a,5,5a,7,8,13a,15,15a,15b,16-decahydro-2H-4,6-methanoindolo[3,2,1-ij]oxepino[2,3,4-de]pyrrolo[2,3-h]quinolin-14-one	COc1cc2N3C(=O)C[C@H]4[C@H]5[C@H]3[C@@]3(c2cc1O)CCN1[C@H]3C[C@H]5C(=CCO4)C1
T10	-9.1	CID14309762	Lupinalbin C	7,20-dihydroxy-17-(2-hydroxypropan-2-yl)-10,12,16-trioxapentacyclo[11.7.0.03,11.04,9.015,19]icosa-1(20),3(11),4(9),5,7,13,15(19)-heptaen-2-one	Oc1ccc2c(c1)oc1c2c(=O)c2c(o1)cc1c(c2O)C[C@H](O1)C(O)(C)C
T11	-9.1	CID441071	Strychnine	(4aR,5aS,8aR,13aS,15aS,15bR)-4a,5,5a,7,8,13a,15,15a,15b,16-decahydro-2H-4,6-methanoindolo[3,2,1-ij]oxepino[2,3,4-de]pyrrolo[2,3-h]quinolin-14-one	O=C1C[C@@H]2OCC=C3[C@H]4[C@@H]2[C@@H]2N1c1ccccc1[C@]12CCN([C@H]1C4)C3
T12	-9.1	CID5459059	Ribasine	(1S,12R,14S)-13-methyl-5,7,17,19,25-pentaoxa-13-azaheptacyclo[12.10.1.01,12.02,10.04,8.015,23.016,20]pentacosa-2,4(8),9,15(23),16(20),21-hexaene	CN1[C@H]2O[C@@]3([C@H]1Cc1c3cc3c(c1)OCO3)Cc1c2c2OCOc2cc1
T13	-9.1	CID76326662	3Alpha,17Alpha-Cinchophylline	(2S,3R,12bS)-3-ethenyl-2-[[(1R)-5-methoxy-2,3,4,9-tetrahydro-1H-pyrido[3,4-b]indol-1-yl]methyl]-1,2,3,4,6,7,12,12b-octahydroindolo[2,3-a]quinolizine	C=C[C@H]1CN2CCc3c([C@@H]2C[C@@H]1C[C@H]1NCCc2c1[nH]c1c2c(OC)ccc1)[nH]c1c3cccc1
T14	-9	CID101277371	Icajine	(10S,22R,23R,24S)-4-methyl-9-oxa-4,13-diazahexacyclo[11.6.5.01,24.06,22.010,23.014,19]tetracosa-6,14,16,18-tetraene-12,20-dione	CN1CC[C@]23C(=O)C[C@H]4C(=CCO[C@@H]5[C@H]4[C@@H]3N(c3c2cccc3)C(=O)C5)C1
T15	-9	CID101282059	Protostrychnine	(1R,11R,12R,13R,14Z,19S,21S)-11-hydroxy-14-(2-hydroxyethylidene)-8,16-diazahexacyclo[11.5.2.11,8.02,7.016,19.012,21]henicosa-2,4,6-trien-9-one	OC/C=C/1\CN2CC[C@@]34[C@@H]2C[C@@H]1[C@H]1[C@H](O)CC(=O)N([C@H]31)c1c4cccc1
T16	-9	CID101595	Vomicine	(1S,10S,22R,23R,24S)-15-hydroxy-4-methyl-9-oxa-4,13-diazahexacyclo[11.6.5.01,24.06,22.010,23.014,19]tetracosa-6,14(19),15,17-tetraene-12,20-dione	CN1CC[C@@]23C(=O)C[C@H]4C(=CCO[C@@H]5[C@H]4[C@@H]2N(c2c3cccc2O)C(=O)C5)C1
T17	-9	CID210990	14-Hydroxyicajine	22-hydroxy-4-methyl-9-oxa-4,13-diazahexacyclo[11.6.5.01,24.06,22.010,23.014,19]tetracosa-6,14,16,18-tetraene-12,20-dione	CN1CC[C@]23C(=O)C[C@]4(C(=CCO[C@H]5[C@H]4[C@@H]3N(c3c2cccc3)C(=O)C5)C1)O
T18	-9	CID211181	4-Hydroxystrychnine	(4aR,5aS,13aS,15aS,15bR)-12-hydroxy-4a,5,5a,7,8,13a,15,15a,15b,16-decahydro-2H-4,6-methanoindolo[3,2,1-ij]oxepino[2,3,4-de]pyrrolo[2,3-h]quinolin-14-one	O=C1C[C@@H]2OCC=C3[C@H]4[C@@H]2[C@@H]2N1c1c(O)cccc1[C@]12CCN([C@H]1C4)C3
T19	-9	CID21723446	Pseudostrychnine	(4aR,5aR,8aS,13aS,15aS,15bR)-5a-hydroxy-2,4a,5,7,8,13a,15,15a,15b,16-decahydro4,6-methanoindolo[3,2,1-ij]oxepino[2,3,4-de]pyrrolo[2,3-h]quinolin-14-one	O=C1C[C@@H]2OCC=C3[C@H]4[C@@H]2[C@@H]2N1c1ccccc1[C@]12CCN([C@]1(C4)O)C3
T20	-9	CID5257090	Annomontine	4-(9H-pyrido[3,4-b]indol-1-yl)pyrimidin-2-amine	Nc1nccc(n1)c1nccc2c1[nH]c1c2cccc1
T21	-9	CID5386368	Dalspinin-7-O-.beta.-D-galactopyranoside	3-(1,3-benzodioxol-5-yl)-5-hydroxy-6-methoxy-7-[3,4,5-trihydroxy-6-(hydroxymethyl)oxan-2-yl]oxychromen-4-one	OC[C@@H]1O[C@H](Oc2cc3occ(c(=O)c3c(c2OC)O)c2ccc3c(c2)OCO3)[C@@H]([C@@H]([C@H]1O)O)O
T22	-8.9	CID100947536	Isozeylanone	5-hydroxy-3-[(5-hydroxy-1,4-dioxonaphthalen-2-yl)methyl]-2-methylnaphthalene-1,4-dione	CC1=C(CC2=CC(=O)c3c(C2=O)cccc3O)C(=O)c2c(C1=O)cccc2O
T23	-8.9	CID10185	Dihydroquercetin	(2R)-2-(3,4-dihydroxyphenyl)-3,5,7-trihydroxy-2,3-dihydrochromen-4-one	Oc1cc2O[C@H](c3ccc(c(c3)O)O)[C@@H](C(=O)c2c(c1)O)O
T24	-8.9	CID124069	Dihydrosanguinarine	24-methyl-5,7,18,20-tetraoxa-24-azahexacyclo[11.11.0.02,10.04,8.014,22.017,21]tetracosa-1(13),2,4(8),9,11,14(22),15,17(21)-octaene	CN1Cc2c3OCOc3ccc2c2c1c1cc3OCOc3cc1cc2
T25	-8.9	CID42607801	Aervanone	(2S)-7-hydroxy-2-(4-hydroxyphenyl)-8-[(2S,3R,4R,5R,6R)-3,4,5-trihydroxy-6-(hydroxymethyl)oxan-2-yl]-2,3-dihydrochromen-4-one	OC[C@H]1O[C@H]([C@@H]([C@H]([C@H]1O)O)O)c1c(O)ccc2c1O[C@@H](CC2=O)c1ccc(cc1)O
T26	-8.9	CID5378771	Lupinisoflavone D	5,7-dihydroxy-3-[4-hydroxy-2-(2-hydroxypropan-2-yl)-2,3-dihydro-1-benzofuran-5-yl]chromen-4-one	Oc1cc(O)c2c(c1)occ(c2=O)c1ccc2c(c1O)C[C@@H](O2)C(O)(C)C
T27	-8.9	CID609840	Isorheagenine	13-methyl-5,7,19,21,25-pentaoxa-13-azahexacyclo[12.11.0.02,10.04,8.015,23.018,22]pentacosa-2,4(8),9,15(23),16,18(22)-hexaen-24-ol	CN1CCc2c([C@@H]3[C@H]1c1ccc4c(c1[C@@H](O3)O)OCO4)cc1c(c2)OCO1
T28	-8.8	CID101041139	Jusmicranthin	10-(1,3-benzodioxol-5-yl)-9-hydroxy-9H-[2]benzofuro[6,5-g][1,3]benzodioxol-7-one	O=C1O[C@@H](c2c1cc1ccc3c(c1c2c1ccc2c(c1)OCO2)OCO3)O
T29	-8.8	CID101316884	Acanthotoxin	(4Z)-3-(1,3-benzodioxol-5-ylmethyl)-4-(1,3-benzodioxol-5-ylmethylidene)oxolan-2-ol	O[C@H]1OC/C(=C\c2ccc3c(c2)OCO3)/[C@@H]1Cc1ccc2c(c1)OCO2
T30	-8.8	CID10382239	Isostrychnine	(1R,13S,14Z,19S,21S)-14-(2-hydroxyethylidene)-8,16-diazahexacyclo[11.5.2.11,8.02,7.016,19.012,21]henicosa-2,4,6,11-tetraen-9-one	OC/C=C/1\CN2CC[C@@]34[C@@H]2C[C@@H]1C1=CCC(=O)N([C@H]31)c1c4cccc1
T31	-8.8	CID124079391	Isostrychnine N-oxide	(1S,13S,14E,19S,21S)-14-(2-hydroxyethylidene)-16-oxido-8-aza-16-azoniahexacyclo[11.5.2.11,8.02,7.016,19.012,21]henicosa-2,4,6,11-tetraen-9-one	OC/C=C\1/C[N@+]2([O-])CC[C@@]34[C@@H]2C[C@@H]1C1=CCC(=O)N([C@H]31)c1c4cccc1
T32	-8.8	CID16745513	4-Hydroxysesamin	(3S,3aS,6S,6aR)-3,6-bis(1,3-benzodioxol-5-yl)-1,3,3a,4,6,6a-hexahydrofuro[3,4-c]furan-4-ol	O[C@@H]1O[C@@H]([C@@H]2[C@H]1[C@H](OC2)c1ccc2c(c1)OCO2)c1ccc2c(c1)OCO2
T33	-8.8	CID2754650	Irenolone	2-hydroxy-4-(4-hydroxyphenyl)phenalen-1-one	Oc1ccc(cc1)c1ccc2c3c1C=C(O)C(=O)c3ccc2
T34	-8.8	CID28681	Diospyrol	2-(1,8-dihydroxy-6-methylnaphthalen-2-yl)-6-methylnaphthalene-1,8-diol	Cc1cc(O)c2c(c1)ccc(c2O)c1ccc2c(c1O)c(O)cc(c2)C
T35	-8.8	CID372738	Scutellaprostin D	(2R,3S)-10-hydroxy-3-(4-hydroxy-3-methoxyphenyl)-2-methoxy-7-phenyl-2,3-dihydropyrano[3,2-g][1,4]benzodioxin-9-one	CO[C@@H]1Oc2c(O[C@H]1c1ccc(c(c1)OC)O)cc1c(c2O)c(=O)cc(o1)c1ccccc1
T36	-8.8	CID44257628	Chrysin 7-glucuronide	(3S,4S,6S)-3,4,5-trihydroxy-6-(5-hydroxy-4-oxo-2-phenylchromen-7-yl)oxyoxane-2-carboxylic acid	OC(=O)[C@H]1O[C@@H](Oc2cc(O)c3c(c2)oc(cc3=O)c2ccccc2)[C@H]([C@H]([C@@H]1O)O)O
T37	-8.8	CID493164	Taiwanin E	9-(1,3-benzodioxol-5-yl)-5-hydroxy-6H-[2]benzofuro[5,6-f][1,3]benzodioxol-8-one	Oc1c2COC(=O)c2c(c2c1cc1OCOc1c2)c1ccc2c(c1)OCO2
T38	-8.8	CID5486931		2-hydroxy-11-(2-methylprop-1-enyl)-10-oxapentacyclo[10.8.1.03,8.09,21.014,19]henicosa-1,3,5,7,9(21),11,14,16,18-nonaene-13,20-dione	CC(=Cc1oc2c3c1C(=O)c1ccccc1C(=O)c3c(c1c2cccc1)O)C
T39	-8.8	CID71453399	3-Methoxyicajine	(1S,10S,22R,23R,24S)-7-methoxy-4-methyl-9-oxa-4,13-diazahexacyclo[11.6.5.01,24.06,22.010,23.014,19]tetracosa-6,14,16,18-tetraene-12,20-dione	COC1=C2CN(C)CC[C@@]34C(=O)C[C@@H]2[C@H]2[C@@H](OC1)CC(=O)N([C@H]32)c1c4cccc1
T40	-8.8	CID78411088	l-N-Acetylanonaine	1-(3,5-dioxa-11-azapentacyclo[10.7.1.02,6.08,20.014,19]icosa-1(20),2(6),7,14,16,18-hexaen-11-yl)ethanone	CC(=O)N1CCc2c3[C@@H]1Cc1ccccc1c3c1c(c2)OCO1
T41	-8.8	CID90473021	Trisjuglone	1,7,13-trihydroxytrinaphthylene-5,6,11,12,17,18-hexone	Oc1cccc2c1c(=O)c1c(c2=O)c2c(c3c1c(=O)c1c(c3=O)c(O)ccc1)c(=O)c1c(c2=O)c(O)ccc1
T42	-8.7	CID101589321	Ixerisoside D	(3aS,5R,6aR,9aR,9bS)-3,6,9-trimethylidene-5-[(2R,3R,4S,5S,6R)-3,4,5-trihydroxy-6-(hydroxymethyl)oxan-2-yl]oxy-3a,4,5,6a,7,8,9a,9b-octahydroazuleno[4,5-b]furan-2-one	OC[C@H]1O[C@@H](O[C@@H]2C[C@H]3C(=C)C(=O)O[C@@H]3[C@@H]3[C@H](C2=C)CCC3=C)[C@@H]([C@H]([C@@H]1O)O)O
T43	-8.7	CID12305769	Alphitonin	2-[(3,4-dihydroxyphenyl)methyl]-2,4,6-trihydroxy-1-benzofuran-3-one	Oc1cc2O[C@@](C(=O)c2c(c1)O)(O)Cc1ccc(c(c1)O)O
T44	-8.7	CID13994712	11-Methoxydiaboline	1-[(4R,12S,13R,14R,19R,21S)-14-hydroxy-8-methoxy-15-oxa-1,11-diazahexacyclo[16.3.1.04,12.04,21.05,10.013,19]docosa-5(10),6,8,17-tetraen-11-yl]ethanone	COc1ccc2c(c1)N(C(=O)C)[C@@H]1[C@@]32CCN2[C@H]3C[C@@H]3[C@H]1[C@H](O)OCC=C3C2
T45	-8.7	CID15071950	Hippeastrine N-oxide	(2S,3S,9S,10S)-9-hydroxy-4-methyl-4-oxido-11,16,18-trioxa-4-azoniapentacyclo[11.7.0.02,10.03,7.015,19]icosa-1(20),7,13,15(19)-tetraen-12-one	O[C@H]1C=C2CC[N@+]([C@H]2[C@H]2[C@@H]1OC(=O)c1c2cc2c(c1)OCO2)([O-])C
T46	-8.7	CID15689618	Catechin 5-O-gallate	[(2R,3S)-2-(3,4-dihydroxyphenyl)-3,7-dihydroxy-3,4-dihydro-2H-chromen-5-yl] 3,4,5-trihydroxybenzoate	Oc1cc(OC(=O)c2cc(O)c(c(c2)O)O)c2c(c1)O[C@@H]([C@H](C2)O)c1ccc(c(c1)O)O
T47	-8.7	CID21723445	16-Methoxystrychnine	(4aR,5aR,8aS,13aS,15aS,15bR)-5a-methoxy-2,4a,5,7,8,13a,15,15a,15b,16-decahydro4,6-methanoindolo[3,2,1-ij]oxepino[2,3,4-de]pyrrolo[2,3-h]quinolin-14-one	CO[C@@]12C[C@H]3C4=CCO[C@@H]5[C@H]3[C@H]3[C@]2(CCN1C4)c1ccccc1N3C(=O)C5
T48	-8.7	CID24360	Camptothecin	(19S)-19-ethyl-19-hydroxy-17-oxa-3,13-diazapentacyclo[11.8.0.02,11.04,9.015,20]henicosa-1(21),2,4,6,8,10,15(20)-heptaene-14,18-dione	CC[C@@]1(O)C(=O)OCc2c1cc1c3nc4ccccc4cc3Cn1c2=O
T49	-8.7	CID442320	Vernoflexuoside	(3aS,6aR,8S,9aR,9bS)-3,6,9-trimethylidene-8-[(2R,3R,4S,5S,6R)-3,4,5-trihydroxy-6-(hydroxymethyl)oxan-2-yl]oxy-3a,4,5,6a,7,8,9a,9b-octahydroazuleno[4,5-b]furan-2-one	OC[C@H]1O[C@@H](O[C@H]2C[C@@H]3[C@H](C2=C)[C@H]2OC(=O)C(=C)[C@@H]2CCC3=C)[C@@H]([C@H]([C@@H]1O)O)O
T50	-8.7	CID44257569	Bayin	7-hydroxy-2-(4-hydroxyphenyl)-8-[(2S,4R,5S)-3,4,5-trihydroxy-6-(hydroxymethyl)oxan-2-yl]chromen-4-one	OC[C@H]1O[C@H]([C@H]([C@H]([C@@H]1O)O)O)c1c(O)ccc2c1oc(cc2=O)c1ccc(cc1)O
T51	-8.7	CID44258663	Artonin J	6,8,17,19-tetrahydroxy-14,14-dimethyl-18-(3-methylbut-2-enyl)-3,15-dioxapentacyclo[11.6.1.02,11.04,9.016,20]icosa-1(20),2(11),4,6,8,16,18-heptaen-10-one	CC(=CCc1c(O)c2c3oc4cc(O)cc(c4c(=O)c3C[C@H]3c2c(c1O)OC3(C)C)O)C
T52	-8.7	CID44260097	Lupinalbin E	16,18-dihydroxy-7-(2-hydroxypropan-2-yl)-6,11,13-trioxapentacyclo[10.8.0.02,10.05,9.014,19]icosa-1(12),2(10),3,5(9),14,16,18-heptaen-20-one	Oc1cc(O)c2c(c1)oc1c(c2=O)c2c(o1)c1C[C@@H](Oc1cc2)C(O)(C)C
T53	-8.7	CID467295	Epiafzelechin 3-O-gallate	[(2R,3R)-5,7-dihydroxy-2-(4-hydroxyphenyl)-3,4-dihydro-2H-chromen-3-yl] 3,4,5-trihydroxybenzoate	Oc1ccc(cc1)[C@H]1Oc2cc(O)cc(c2C[C@H]1OC(=O)c1cc(O)c(c(c1)O)O)O
T54	-8.7	CID49769861	(-)-8-oxotetrahydropalmatine	2,3,9,10-tetrahydroxy-5,6,13,13a-tetrahydroisoquinolino[2,1-b]isoquinolin-8-one	Oc1cc2CCN3[C@@H](c2cc1O)Cc1c(C3=O)c(O)c(cc1)O
T55	-8.7	CID5319484	Apigenin-7-glucuronide	(2S,3S,4S,5R,6S)-3,4,5-trihydroxy-6-[5-hydroxy-2-(4-hydroxyphenyl)-4-oxochromen-7-yl]oxyoxane-2-carboxylic acid	OC(=O)[C@H]1O[C@@H](Oc2cc(O)c3c(c2)oc(cc3=O)c2ccc(cc2)O)[C@@H]([C@H]([C@@H]1O)O)O
T56	-8.6	CID101316779	Hydroxymetasequirin A	4-[(2S,3S,4S)-2-[(S)-(3,4-dihydroxyphenyl)-hydroxymethyl]-4-hydroxyoxolan-3-yl]benzene-1,2-diol	O[C@@H]1CO[C@@H]([C@H]1c1ccc(c(c1)O)O)[C@H](c1ccc(c(c1)O)O)O
T57	-8.6	CID363127	Taiwanin C	5-(1,3-benzodioxol-5-yl)-8H-[2]benzofuro[5,6-f][1,3]benzodioxol-6-one	O=C1OCc2c1c(c1ccc3c(c1)OCO3)c1c(c2)cc2c(c1)OCO2
T58	-8.6	CID5245667	8-Oxycoptisine	5,7,17,19-tetraoxa-13-azahexacyclo[11.11.0.02,10.04,8.015,23.016,20]tetracosa-1(24),2,4(8),9,15(23),16(20),21-heptaen-14-one	O=c1c2c(ccc3c2OCO3)cc2n1CCc1c2cc2c(c1)OCO2
T59	-8.6	CID5273807	Justirumalin	10-(1,3-benzodioxol-5-yl)-6-hydroxy-7H-[2]benzofuro[5,6-g][1,3]benzodioxol-9-one	O=C1OCc2c1c(c1ccc3c(c1)OCO3)c1c(c2O)ccc2c1OCO2
T60	-8.6	CID5280441	Vitexin	5,7-dihydroxy-2-(4-hydroxyphenyl)-8-[(2S,3R,4R,5S,6R)-3,4,5-trihydroxy-6-(hydroxymethyl)oxan-2-yl]chromen-4-one	OC[C@H]1O[C@H]([C@@H]([C@H]([C@@H]1O)O)O)c1c(O)cc(c2c1oc(cc2=O)c1ccc(cc1)O)O
T61	-8.6	CID5491526	Edgeworthin	6,7-dihydroxy-3-(2-oxochromen-7-yl)oxychromen-2-one	O=c1ccc2c(o1)cc(cc2)Oc1cc2cc(O)c(cc2oc1=O)O
T62	-8.6	CID568919	2,4,6-Triphenyl-1,3-dioxane	2,4,6-triphenyl-1,3-dioxane	c1ccc(cc1)[C@H]1C[C@@H](O[C@@H](O1)c1ccccc1)c1ccccc1
T63	-8.6	CID6419835	(-)-Catechin gallate	[(2S,3R)-2-(3,4-dihydroxyphenyl)-5,7-dihydroxy-3,4-dihydro-2H-chromen-3-yl] 3,4,5-trihydroxybenzoate	Oc1cc(O)c2c(c1)O[C@H]([C@@H](C2)OC(=O)c1cc(O)c(c(c1)O)O)c1ccc(c(c1)O)O
T64	-8.6	CID697545	(R)-stylopine	(1R)-5,7,17,19-tetraoxa-13-azahexacyclo[11.11.0.02,10.04,8.015,23.016,20]tetracosa-2,4(8),9,15(23),16(20),21-hexaene	C1Oc2c(O1)cc1c(c2)CCN2[C@@H]1Cc1ccc3c(c1C2)OCO3
T65	-8.6	CID72276	(-)-Epicatechin	(2R,3R)-2-(3,4-dihydroxyphenyl)-3,4-dihydro-2H-chromene-3,5,7-triol	Oc1cc2O[C@H](c3ccc(c(c3)O)O)[C@@H](Cc2c(c1)O)O
T66	-8.6	CID72277	(-)-Epigallocatechin	(2R,3R)-2-(3,4,5-trihydroxyphenyl)-3,4-dihydro-2H-chromene-3,5,7-triol	Oc1cc2O[C@H](c3cc(O)c(c(c3)O)O)[C@@H](Cc2c(c1)O)O
T67	-8.6	CID821351	Ovigerine	(12S)-4,6,19,21-tetraoxa-13-azahexacyclo[10.10.1.02,10.03,7.016,23.018,22]tricosa-1(23),2(10),3(7),8,16,18(22)-hexaene	C1Oc2c(O1)c1c3c(c2)CCN[C@H]3Cc2c1c1OCOc1cc2
T68	-8.6	CID97174	10,10'-Bianthronyl	10-(10-oxo-9H-anthracen-9-yl)-10H-anthracen-9-one	O=C1c2ccccc2C(c2c1cccc2)C1c2ccccc2C(=O)c2c1cccc2
T69	-8.6	CID97679	Norsanguinarine	5,7,18,20-tetraoxa-24-azahexacyclo[11.11.0.02,10.04,8.014,22.017,21]tetracosa-1(24),2,4(8),9,11,13,15,17(21),22-nonaene	C1Oc2c(O1)cc1c(c2)ccc2c1ncc1c2ccc2c1OCO2
T70	-8.5	CID10021410	Latinone	7-hydroxy-3,6-dimethoxy-9-phenylphenanthrene-1,4-dione	COC1=CC(=O)c2c(C1=O)c1cc(OC)c(cc1c(c2)c1ccccc1)O
T71	-8.5	CID101253695		4-(1-hydroxy-3-methyl-6,7,8,9-tetrahydropyridazino[1,2-a]indazol-11-ylidene)cyclohexa-2,5-dien-1-one	O=C1C=C/C(=c/2\n3CCCCn3c3c2c(O)cc(c3)C)/C=C1
T72	-8.5	CID101685340	Hetidine	(1R,3R,4S,5R,8R,9S,11S,14R,17S,18R)-3,4-dihydroxy-5,7-dimethyl-12-methylidene-7-azahexacyclo[9.6.2.01,8.05,17.09,14.014,18]nonadecane-10,16-dione	CN1C[C@]2(C)[C@H](O)[C@@H](C[C@]34[C@H]1[C@H]1C(=O)[C@H]5C[C@@H]4[C@]1(CC(=O)[C@H]23)CC5=C)O
T73	-8.5	CID102067319	Pseudo-beta-Colubrine	(4aR,5aR,8aS,13aS,15aS,15bR)-5a-hydroxy-10-methoxy-2,4a,5,7,8,13a,15,15a,15b,16-decahydro4,6-methanoindolo[3,2,1-ij]oxepino[2,3,4-de]pyrrolo[2,3-h]quinolin-14-one	COc1ccc2c(c1)[C@@]13CCN4[C@@]3(O)C[C@@H]3[C@@H]5[C@@H]1N2C(=O)C[C@@H]5OCC=C3C4
T74	-8.5	CID10523159	(+)-Episesaminone	1,3-benzodioxol-5-yl-[(3R,4R,5S)-5-(1,3-benzodioxol-5-yl)-4-(hydroxymethyl)oxolan-3-yl]methanone	OC[C@@H]1[C@H](OC[C@@H]1C(=O)c1ccc2c(c1)OCO2)c1ccc2c(c1)OCO2
T75	-8.5	CID11537197	Boeravinone E	3,6,9,11-tetrahydroxy-10-methyl-6H-chromeno[3,4-b]chromen-12-one	Oc1ccc2c(c1)O[C@H](c1c2c(=O)c2c(o1)cc(c(c2O)C)O)O
T76	-8.5	CID11982272	Silydianin	(1R,3R,6R,7R,10R)-3-hydroxy-10-(4-hydroxy-3-methoxyphenyl)-8-[(2R,3R)-3,5,7-trihydroxy-4-oxo-2,3-dihydrochromen-2-yl]-4-oxatricyclo[4.3.1.03,7]dec-8-en-2-one	COc1cc(ccc1O)[C@@H]1[C@H]2CO[C@@]3([C@H]2C(=C[C@H]1C3=O)[C@H]1Oc2cc(O)cc(c2C(=O)[C@@H]1O)O)O
T77	-8.5	CID12314414	Novacine	(1S,10S,22R,23R,24S)-16,17-dimethoxy-4-methyl-9-oxa-4,13-diazahexacyclo[11.6.5.01,24.06,22.010,23.014,19]tetracosa-6,14,16,18-tetraene-12,20-dione	COc1cc2c(cc1OC)N1[C@@H]3[C@@]42CCN(C)CC2=CCO[C@H]([C@@H]3[C@H]2CC4=O)CC1=O
T78	-8.5	CID13747828	(-)-Paulownin	(3S,3aR,6R,6aS)-3,6-bis(1,3-benzodioxol-5-yl)-3,4,6,6a-tetrahydro-1H-furo[3,4-c]furan-3a-ol	O[C@@]12CO[C@H]([C@@H]1CO[C@H]2c1ccc2c(c1)OCO2)c1ccc2c(c1)OCO2
T79	-8.5	CID14237664	Lupinisoflavone J	5,7-dihydroxy-3-[4-hydroxy-2-(2-hydroxypropan-2-yl)-2,3-dihydro-1-benzofuran-7-yl]-6-(3-methylbut-2-enyl)chromen-4-one	CC(=CCc1c(O)cc2c(c1O)c(=O)c(co2)c1ccc(c2c1O[C@@H](C2)C(O)(C)C)O)C
T80	-8.5	CID165547	Oroboidine	[(1S,2S,4S,9S,10R)-14-oxo-7,15-diazatetracyclo[7.7.1.02,7.010,15]heptadecan-4-yl] 1H-pyrrole-2-carboxylate	O=C1CCC[C@H]2N1C[C@@H]1C[C@H]2CN2[C@H]1C[C@H](CC2)OC(=O)c1ccc[nH]1
T81	-8.5	CID169996	Melacacidin	(2R,3R,4R)-2-(3,4-dihydroxyphenyl)-3,4-dihydro-2H-chromene-3,4,7,8-tetrol	O[C@H]1[C@@H](O)[C@H](Oc2c1ccc(c2O)O)c1ccc(c(c1)O)O
T82	-8.5	CID185756	Leptophylloside	(2R)-9-hydroxy-2-[2-[(2S,3R,4S,5S,6R)-3,4,5-trihydroxy-6-(hydroxymethyl)oxan-2-yl]oxypropan-2-yl]-2,3-dihydrofuro[3,2-g]chromen-7-one	OC[C@H]1O[C@@H](OC([C@H]2Cc3c(O2)c(O)c2c(c3)ccc(=O)o2)(C)C)[C@@H]([C@H]([C@@H]1O)O)O
T83	-8.5	CID21123660	Teuscordinon	(5'S,6aS,7R,8R,10aR)-5'-(furan-3-yl)-8-methylspiro[1,5,6,6a,8,9-hexahydrobenzo[d][2]benzofuran-7,3'-oxolane]-2',3,10-trione	O=C1OC[C@@]23C1=CCC[C@@H]3[C@]1([C@@H](CC2=O)C)C[C@H](OC1=O)c1cocc1
T84	-8.5	CID21586648	Gravacridonetriol	5-hydroxy-11-methyl-2-(1,2,3-trihydroxypropan-2-yl)-1,2-dihydrofuro[2,3-c]acridin-6-one	OCC([C@@H]1Oc2c(C1)c1c(c(c2)O)c(=O)c2c(n1C)cccc2)(CO)O
T85	-8.5	CID21629801	Epigallocatechin 3-O-cinnamate	[(2R,3R)-5,7-dihydroxy-2-(3,4,5-trihydroxyphenyl)-3,4-dihydro-2H-chromen-3-yl] (E)-3-phenylprop-2-enoate	O=C(O[C@@H]1Cc2c(O)cc(cc2O[C@@H]1c1cc(O)c(c(c1)O)O)O)/C=C/c1ccccc1
T86	-8.5	CID21721881	Cedrin	(2R,3R)-3,5,7-trihydroxy-6-methyl-2-(3,4,5-trihydroxyphenyl)-2,3-dihydrochromen-4-one	O[C@@H]1[C@H](Oc2c(C1=O)c(O)c(c(c2)O)C)c1cc(O)c(c(c1)O)O
T87	-8.5	CID21722946	Gmelanone	(1R,2S,5S)-2,5-bis(1,3-benzodioxol-5-yl)-3,6-dioxabicyclo[3.2.1]octan-8-one	O=C1[C@@H]2CO[C@]1(CO[C@@H]2c1ccc2c(c1)OCO2)c1ccc2c(c1)OCO2
T88	-8.5	CID251890	beta-Colubrine	(4aR,5aS,8aR,13aS,15aS,15bR)-10-methoxy-4a,5,5a,7,8,13a,15,15a,15b,16-decahydro-2H-4,6-methanoindolo[3,2,1-ij]oxepino[2,3,4-de]pyrrolo[2,3-h]quinolin-14-one	COc1ccc2c(c1)[C@]13CCN4[C@H]1C[C@@H]1[C@@H]5[C@@H]3N2C(=O)C[C@@H]5OCC=C1C4
T89	-8.5	CID325518	Cajanone	7-[2,4-dihydroxy-5-(3-methylbut-2-enyl)phenyl]-5-hydroxy-2,2-dimethyl-7,8-dihydropyrano[3,2-g]chromen-6-one	CC(=CCc1cc(c(cc1O)O)[C@H]1COc2c(C1=O)c(O)c1c(c2)OC(C=C1)(C)C)C
T90	-8.5	CID438692	Ararobinol	10-(4,5-dihydroxy-2-methyl-10-oxo-9H-anthracen-9-yl)-1,8-dihydroxy-3-methyl-10H-anthracen-9-one	Cc1cc(O)c2c(c1)[C@H]([C@H]1c3cccc(c3C(=O)c3c1cc(C)cc3O)O)c1c(C2=O)c(O)ccc1
T91	-8.5	CID492901	Retrohelioxanthin	10-(1,3-benzodioxol-5-yl)-7H-[2]benzofuro[5,6-g][1,3]benzodioxol-9-one	O=C1OCc2c1c(c1ccc3c(c1)OCO3)c1c(c2)ccc2c1OCO2
T92	-8.5	CID5276454	(+)-Catechin gallate	[(2R,3S)-2-(3,4-dihydroxyphenyl)-5,7-dihydroxy-3,4-dihydro-2H-chromen-3-yl] 3,4,5-trihydroxybenzoate	Oc1cc(O)c2c(c1)O[C@@H]([C@H](C2)OC(=O)c1cc(O)c(c(c1)O)O)c1ccc(c(c1)O)O
T93	-8.5	CID5318717	Juglanin	3-[(2S,3R,4R,5S)-3,4-dihydroxy-5-(hydroxymethyl)oxolan-2-yl]oxy-5,7-dihydroxy-2-(4-hydroxyphenyl)chromen-4-one	OC[C@@H]1O[C@H]([C@@H]([C@H]1O)O)Oc1c(oc2c(c1=O)c(O)cc(c2)O)c1ccc(cc1)O
T94	-8.5	CID5748205	3'-Hydroxypuerarin	3-(3,4-dihydroxyphenyl)-7-hydroxy-8-[(2S,3R,4R,5S,6R)-3,4,5-trihydroxy-6-(hydroxymethyl)oxan-2-yl]chromen-4-one	OC[C@H]1O[C@H]([C@@H]([C@H]([C@@H]1O)O)O)c1c(O)ccc2c1occ(c2=O)c1ccc(c(c1)O)O
T95	-8.5	CID66868	Porphine	21,22-dihydroporphyrin	C1=C/C/2=C/c3ccc([nH]3)/C=c/3\[nH]/c(=C\C4=N/C(=C\C1=N2)/C=C4)/cc3
T96	-8.5	CID91741938	Plaunolide	(5'S,6aS,7S,10aS)-5'-(furan-3-yl)-8-methylidenespiro[1,5,6,6a,9,10-hexahydrobenzo[d][2]benzofuran-7,3'-oxolane]-2',3-dione	O=C1OC[C@@]23C1=CCC[C@@H]3[C@]1(C(=C)CC2)C[C@H](OC1=O)c1cocc1

## Sheet: Table S2
Table S2: Top list of 9 phytochemical inhibitors of cathepsin L. For each phytochemical, the table gives the symbol, docked binding energy, Pubchem identifier, common name, IUPAC name and SMILES.
Phytochemical symbol	Binding energy (kcal/mol)	PubChem identifier	Common name	IUPAC name	SMILES
C1	-8.9	CID438692	Ararobinol	10-(4,5-dihydroxy-2-methyl-10-oxo-9H-anthracen-9-yl)-1,8-dihydroxy-3-methyl-10H-anthracen-9-one	Cc1cc(O)c2c(c1)[C@H]([C@H]1c3cccc(c3C(=O)c3c1cc(C)cc3O)O)c1c(C2=O)c(O)ccc1
C2	-8.3	CID189308	(+)-Oxoturkiyenine	7-methylspiro[[1,3]dioxolo[4,5-h][3]benzazepine-6,6'-furo[3,2-g][1,3]benzodioxole]-5,7'-dione	CN1C=Cc2c(C(=O)[C@]31C(=O)Oc1c3ccc3c1OCO3)cc1c(c2)OCO1
C3	-8.3	CID76326662	3Alpha,17Alpha-Cinchophylline	(2S,3R,12bS)-3-ethenyl-2-[[(1R)-5-methoxy-2,3,4,9-tetrahydro-1H-pyrido[3,4-b]indol-1-yl]methyl]-1,2,3,4,6,7,12,12b-octahydroindolo[2,3-a]quinolizine	C=C[C@H]1CN2CCc3c([C@@H]2C[C@@H]1C[C@H]1NCCc2c1[nH]c1c2c(OC)ccc1)[nH]c1c3cccc1
C4	-8.2	CID102151885	Rugosanine B	(13Z)-10-benzyl-6-[2-(dimethylamino)-3-(1H-indol-2-yl)propanoyl]-16-methoxy-2-oxa-6,9,12-triazatricyclo[13.3.1.03,7]nonadeca-1(19),13,15,17-tetraene-8,11-dione	COc1ccc2cc1/C=C/NC(=O)[C@H](Cc1ccccc1)NC(=O)[C@H]1[C@H](O2)CCN1C(=O)[C@H](N(C)C)Cc1cc2c([nH]1)cccc2
C5	-8.2	CID442120	Trichotomine	(5S)-2-[(5S)-5-carboxy-3-hydroxy-6,11-dihydro-5H-indolizino[8,7-b]indol-2-yl]-3-oxo-5,6-dihydroindolizino[8,7-b]indole-5-carboxylic acid	OC(=O)[C@@H]1CC2=c3ccccc3=NC2=C2N1C(=O)C(=C2)c1cc2n(c1O)[C@@H](Cc1c2[nH]c2c1cccc2)C(=O)O
C6	-8.1	CID161453	Tectol	5-(6-hydroxy-2,2-dimethylbenzo[h]chromen-5-yl)-2,2-dimethylbenzo[h]chromen-6-ol	Oc1c(c2c3C=CC(Oc3c3c(c2O)cccc3)(C)C)c2C=CC(Oc2c2c1cccc2)(C)C
C7	-8.1	CID42608131	Silymonin	(3R)-9-[(2S)-5,7-dihydroxy-4-oxo-2,3-dihydrochromen-2-yl]-3-hydroxy-10-(4-hydroxy-3-methoxyphenyl)-4-oxatricyclo[4.3.1.03,7]dec-8-en-2-one	COc1cc(ccc1O)[C@@H]1[C@H]2CO[C@@]3([C@H]2C=C([C@H]1C3=O)[C@@H]1CC(=O)c2c(O1)cc(cc2O)O)O
C8	-8	CID5320555	Picrasidine M	6-[2-(4,8-dimethoxy-9H-pyrido[3,4-b]indol-1-yl)ethyl]-1,6-diazatetracyclo[7.6.1.05,16.010,15]hexadeca-4,7,9(16),10,12,14-hexaene-2,3-dione	COc1cccc2c1[nH]c1c2c(OC)cnc1CCn1ccc2c3c1cc(=O)c(=O)n3c1c2cccc1
C9	-8	CID90473021	Trisjuglone	1,7,13-trihydroxytrinaphthylene-5,6,11,12,17,18-hexone	Oc1cccc2c1c(=O)c1c(c2=O)c2c(c3c1c(=O)c1c(c3=O)c(O)ccc1)c(=O)c1c(c2=O)c(O)ccc1

## Sheet: Table S3
Table S3: Herbal sources of top 96 phytochemical inhibitors of TMPRSS2. For each phytochemical, the table gives the symbol, docked binding energy, common name and plant source. Plant sources which have been reported to have anti-viral or anti-inflammatory therapeutic use in traditional medicine literature are shown in bold and marked with an [*] sign.
Phytochemical symbol	Binding energy (kcal/mol)	Common name	Plant source
T1	-9.6	Qingdainone	Strobilanthes cusia [*]
T2	-9.6	Edgeworoside C	Edgeworthia gardneri
T3	-9.6	Adlumidine	Fumaria indica [*]
T4	-9.3	Pseudo-alpha-Colubrine	Strychnos nux-vomica [*]
T5	-9.3	Bicuculline	Fumaria indica [*], Corydalis govaniana [*], Nerium oleander [*]
T6	-9.3	Strychnine N-oxide	Strychnos nux-vomica[*], Strychnos ignatii [*], Strychnos colubrina [*]
T7	-9.2	alpha-Colubrine	Strychnos nux-vomica[*], Strychnos ignatii [*], Strychnos colubrina [*]
T8	-9.2	Egenine	Fumaria vaillantii [*]
T9	-9.2	2-Hydroxy-3-methoxystrychnine	Strychnos nux-vomica[*]
T10	-9.1	Lupinalbin C	Lupinus albus
T11	-9.1	Strychnine	Strychnos nux-vomica[*], Strychnos ignatii [*], Strychnos colubrina [*]
T12	-9.1	Ribasine	Argemone grandiflora
T13	-9.1	3Alpha,17Alpha-Cinchophylline	Cinchona calisaya [*]
T14	-9	Icajine	Strychnos nux-vomica[*], Strychnos ignatii [*], Strychnos colubrina [*]
T15	-9	Protostrychnine	Strychnos nux-vomica[*], Strychnos ignatii [*]
T16	-9	Vomicine	Strychnos nux-vomica[*], Strychnos ignatii [*], Strychnos colubrina [*]
T17	-9	14-Hydroxyicajine	Strychnos wallichiana[*]
T18	-9	4-Hydroxystrychnine	Strychnos nux-vomica[*]
T19	-9	Pseudostrychnine	Strychnos nux-vomica[*], Strychnos ignatii [*], Strychnos colubrina [*]
T20	-9	Annomontine	Annona reticulata [*]
T21	-9	Dalspinin-7-O-.beta.-D-galactopyranoside	Dalbergia spinosa
T22	-8.9	Isozeylanone	Plumbago zeylanica [*]
T23	-8.9	Dihydroquercetin	Hardwickia binata [*]
T24	-8.9	Dihydrosanguinarine	Papaver somniferum [*], Toddalia asiatica [*], Argemone mexicana [*], Fumaria indica [*]
T25	-8.9	Aervanone	Aerva javanica[*]
T26	-8.9	Lupinisoflavone D	Lupinus albus
T27	-8.9	Isorheagenine	Papaver rhoeas [*], Fumaria indica [*]
T28	-8.8	Jusmicranthin	Justicia neesii
T29	-8.8	Acanthotoxin	Zanthoxylum acanthopodium [*]
T30	-8.8	Isostrychnine	Strychnos nux-vomica[*], Strychnos ignatii [*]
T31	-8.8	Isostrychnine N-oxide	Strychnos nux-vomica[*]
T32	-8.8	4-Hydroxysesamin	Gmelina arborea [*]
T33	-8.8	Irenolone	Musa paradisiaca [*]
T34	-8.8	Diospyrol	Diospyros mollis
T35	-8.8	Scutellaprostin D	Scutellaria prostrata
T36	-8.8	Chrysin 7-glucuronide	Scutellaria galericulata [*]
T37	-8.8	Taiwanin E	Cleistanthus collinus
T38	-8.8		Radermachera xylocarpa
T39	-8.8	3-Methoxyicajine	Strychnos nux-vomica[*]
T40	-8.8	l-N-Acetylanonaine	Liriodendron tulipifera
T41	-8.8	Trisjuglone	Juglans regia[*]
T42	-8.7	Ixerisoside D	Cichorium intybus [*]
T43	-8.7	Alphitonin	Persicaria orientalis
T44	-8.7	11-Methoxydiaboline	Strychnos potatorum
T45	-8.7	Hippeastrine N-oxide	Lycoris radiata
T46	-8.7	Catechin 5-O-gallate	Acacia nilotica [*]
T47	-8.7	16-Methoxystrychnine	Strychnos nux-vomica[*]
T48	-8.7	Camptothecin	Ophiorrhiza mungos
T49	-8.7	Vernoflexuoside	Elephantopus scaber [*]
T50	-8.7	Bayin	Castanospermum australe [*]
T51	-8.7	Artonin J	Artocarpus heterophyllus [*]
T52	-8.7	Lupinalbin E	Lupinus albus
T53	-8.7	Epiafzelechin 3-O-gallate	Camellia sinensis [*]
T54	-8.7	(-)-8-oxotetrahydropalmatine	Anamirta cocculus [*]
T55	-8.7	Apigenin-7-glucuronide	Crotalaria juncea [*], Hamelia patens [*], Gmelina asiatica [*], Eucalyptus camaldulensis [*], Bacopa monnieri [*], Cardiospermum halicacabum [*], Barleria cristata [*], Volkameria inermis [*], Anisochilus carnosus [*], Gmelina arborea [*]
T56	-8.6	Hydroxymetasequirin A	Metasequoia glyptostroboides
T57	-8.6	Taiwanin C	Cleistanthus collinus [*]
T58	-8.6	8-Oxycoptisine	Fumaria indica [*]
T59	-8.6	Justirumalin	Justicia neesii
T60	-8.6	Vitexin	Teramnus labialis [*], Luffa cylindrica [*], Viola tricolor [*], Vigna radiata [*], Cynodon dactylon [*], Camellia sinensis [*], Cajanus cajan [*], Cannabis sativa [*], Pistia stratiotes [*], Jatropha gossypiifolia [*], Tamarindus indica [*], Vitex peduncularis [*], Desmodium triflorum [*], Eleusine indica [*], Eleusine coracana [*], Garcinia xanthochymus [*], Jatropha curcas [*], Abrus precatori…
T61	-8.6	Edgeworthin	Edgeworthia gardneri
T62	-8.6	2,4,6-Triphenyl-1,3-dioxane	Asclepias curassavica
T63	-8.6	(-)-Catechin gallate	Lawsonia inermis [*]
T64	-8.6	(R)-stylopine	Dactylicapnos scandens
T65	-8.6	(-)-Epicatechin	Saraca asoca [*], Ricinus communis [*], Myristica fragrans [*], Hibiscus cannabinus [*], Myrtus communis [*], Cassia fistula [*], Moringa oleifera [*], Acacia catechu [*], Pterocarpus marsupium [*], Krameria lappacea [*], Mangifera indica [*], Ocimum tenuiflorum [*], Vicia faba [*], Garcinia mangostana [*]
T66	-8.6	(-)-Epigallocatechin	Terminalia arjuna [*], Casuarina equisetifolia [*], Camellia sinensis [*], Vicia faba [*], Acacia nilotica [*], Moringa oleifera [*], Myrtus communis [*]
T67	-8.6	Ovigerine	Hernandia nymphaeifolia, Hernandia guianensis
T68	-8.6	10,10'-Bianthronyl	Senna alexandrina [*]
T69	-8.6	Norsanguinarine	Argemone mexicana [*], Papaver somniferum [*], Fumaria indica [*]
T70	-8.5	Latinone	Dalbergia latifolia [*]
T71	-8.5		Nigella sativa [*]
T72	-8.5	Hetidine	Aconitum heterophyllum [*], Aconitum palmatum [*]
T73	-8.5	Pseudo-beta-Colubrine	Strychnos nux-vomica[*]
T74	-8.5	(+)-Episesaminone	Sesamum indicum [*]
T75	-8.5	Boeravinone E	Boerhavia diffusa [*]
T76	-8.5	Silydianin	Silybum marianum [*]
T77	-8.5	Novacine	Strychnos colubrina [*], Strychnos nux-vomica [*], Strychnos ignatii [*]
T78	-8.5	(-)-Paulownin	Gmelina arborea [*], Gmelina asiatica [*],
T79	-8.5	Lupinisoflavone J	Lupinus albus
T80	-8.5	Oroboidine	Virgilia oroboides,Calpurnia aurea
T81	-8.5	Melacacidin	Albizia amara [*], Albizia lebbeck [*]
T82	-8.5	Leptophylloside	Ruta graveolens[*]
T83	-8.5	Teuscordinon	Teucrium scordium
T84	-8.5	Gravacridonetriol	Ruta graveolens[*]
T85	-8.5	Epigallocatechin 3-O-cinnamate	Camellia sinensis [*]
T86	-8.5	Cedrin	Cedrus deodara [*]
T87	-8.5	Gmelanone	Gmelina arborea [*]
T88	-8.5	beta-Colubrine	Strychnos colubrina [*], Strychnos nux-vomica [*], Strychnos ignatii [*]
T89	-8.5	Cajanone	Cajanus cajan [*]
T90	-8.5	Ararobinol	Senna occidentalis[*]
T91	-8.5	Retrohelioxanthin	Justicia neesii
T92	-8.5	(+)-Catechin gallate	Bergenia ciliata [*]
T93	-8.5	Juglanin	Casuarina equisetifolia [*], Tamarix aphylla [*], Juglans regia [*], Rosa damascena [*], Senna obtusifolia [*]
T94	-8.5	3'-Hydroxypuerarin	Pueraria montana [*]
T95	-8.5	Porphine	Hordeum vulgare [*]
T96	-8.5	Plaunolide	Croton bonplandianus [*]

## Sheet: Table S4
Table S4: The table lists the ligand binding site residues and non-covalent protein-ligand interactions namely, Hydrogen bond interactions, π-π stacking interactions of face-to-face type and face-to-edge type and Hydrophobic interactions that were identified from the docked protein-ligand complexes of the top 96 phytochemical inhibitors of TMPRSS2.
Phytochemical symbol	PubChem identifier	Ligand binding site residues	Hydrogen bond interaction residues	π-π stacking face-to-face interaction residues	π-π stacking face-to-edge interaction residues	Hydrophobic interaction residues
T1	CID5320815	I381,S382,G383,T387,E388,E389,N398,A399,A400,D435,S436,D440,C465,A466	A399,D440			I381,S382,T387,E388,N398,A400,D440,C465,A466
T2	CID101835682	E260,G383,G385,A386,T387,N398,A399,A400,N433,V434,D435,S436,C437,D440,A466	A386,N398,A399,V434,D435,D440			E260,I381,A400,N433,A466
T3	CID120734	E260,I381,S382,T387,E388,E389,N398,A399,A400,N433,D435,S436,C437,D440,C465,A466	E388,E389,S436,C437,C465,A466			E260,I381,S382,T387,N398,A399,A400
T4	CID102067318	E260,I381,S382,G383,A386,T387,N398,A399,A400,N433,V434,D435,S436,C437,D440,A466	A400,N433,D435,C437,D440			E260,I381,S382,T387,N398,A399,V434,D440,A466
T5	CID10237	E260,S382,G383,T387,E388,E389,N398,A399,A400,N433,D435,S436,C437,D440,C465,A466	G383,E388,E389,A400,C437,C465			E260,T387,E388,N398,A399,A466
T6	CID73393	A386,T387,N398,A400,N433,V434,D435,S436,C437,D440,A466	A386,T387,N398,D435			N398,A400,V434,A466
T7	CID12303796	E260,I381,S382,G383,A386,T387,N398,A399,A400,N433,V434,D435,S436,C437,D440	N433,D435,C437,D440			E260,T387,N398,A399,A400,V434,A466
T8	CID189685	E260,S382,G383,A386,T387,E388,E389,N398,A399,A400,N433,D435,C437,D440,C465,A466	G383,E388,E389,A400,C437			E260,T387,E388,N398,A399,A466
T9	CID21680050	E260,I381,S382,G383,A386,T387,N398,A399,A400,N433,V434,D435,S436,C437,D440	S382,T387,N398,A399,N433,D435,C437,D440			E260,N398,A399,A400,V434
T10	CID14309762	I381,S382,G383,A386,T387,E388,E389,N398,A399,A400,D435,S436,C437,D440,C465,A466	G383,E388,E389,N398,D435			T387,E388,N398,A399,A400,S436,C437,A466
T11	CID441071	A386,T387,N398,A400,N433,V434,D435,S436,C437,D440,C465,A466	A386,T387,N398,D435			N398,A400,V434,A466
T12	CID5459059	E260,I381,S382,G383,A386,T387,N398,A400,N433,D435,D440,A466	A386,T387,N398,A400,D440			E260,I381,S382,N398,D440
T13	CID76326662	E260,A386,T387,E388,N398,A399,A400,V434,D435,S436,C437,D440,C465,A466	T387,N398,A399,D435			E260,T387,E388,N398,A400,V434,S436,C437,C465,A466
T14	CID101277371	E260,A386,T387,N398,A399,A400,N433,V434,D435,C437,A466	A386,N398,A399,C437			E260,N398,A399,A400,V434,A466
T15	CID101282059	E260,G383,A386,T387,N398,A399,A400,N433,D435,D440,A466	T387,N398,D435			E260,T387,A400,D440,A466
T16	CID101595	E260,A386,T387,E388,N398,A399,A400,N433,V434,D435,C437,A466	A386,E388,N398,C437			E260,T387,N398,A399,A400,V434,A466
T17	CID210990	E260,A386,T387,N398,A400,N433,V434,D435,C437,D440,A466	A386,T387,N398,N433,D435,A466			E260,N398,A400,V434
T18	CID211181	A386,T387,N398,A400,N433,V434,D435,S436,C437,C465,A466	A386,T387,E388,N398,D435,A466			E260,N398,A400,V434
T19	CID21723446	A386,T387,N398,A400,N433,V434,D435,C437,A466	A386,T387,N398,D435			E260,N398,A400,V434,A466
T20	CID5257090	G383,G385,A386,T387,E388,N398,A400,D435,C437,D440,A466	G383,G385,N398,D440			T387,E388,N398,A400,C437,D440,C465,A466
T21	CID5386368	I381,S382,G383,G385,A386,T387,E388,E389,N398,A399,A400,N433,D435,D440,C465,A466	I381,G385,N398,A400,N433,D435,D440,C465			T387,E388,A400,A466
T22	CID100947536	I381,G383,G385,A386,T387,E388,E389,N398,A400,D435,D440,C465,A466	G383,T387,N398,A400,C465			I381,E388,N398,D440,C465,A466
T23	CID10185	S382,G383,G385,A386,T387,E388,E389,N398,N433,V434,D435,D440,C465,A466	G383,G385,A386,T387,E388,E389,N398,N433,D435,C465			T387,N398,D440,A466
T24	CID124069	A386,T387,E388,E389,N398,A400,N433,D435,S436,C437,D440,C465,A466	A386,E389,D435,S436			T387,E388,N398,A400,A466
T25	CID42607801	E260,I381,S382,G383,G385,A386,T387,E388,E389,N398,A399,A400,D435,D440,C465,A466	I381,S382,G383,T387,E389,N398,A400,D435,D440,C465			E260,I381,E388,C465,A466
T26	CID5378771	I381,S382,G383,A386,T387,E388,E389,N398,A399,A400,N433,D435,S436,D440,C465,A466	E388,E389,N398,A400,D435,D440,C465			T387,E388,V434,C465,A466
T27	CID609840	E260,A386,T387,E388,E389,N398,A400,N433,V434,D435,C465,A466	A386,T387,E388,E389,N398,V434,D435			E260,T387,E388,V434,C465,A466
T28	CID101041139	E260,I381,S382,G383,A386,T387,E388,N398,A400,N433,D435,S436,C437,D440,A466	I381,A386,E388,N398,A400,D435,C437,A466			E260,I381,S382,T387,N398
T29	CID101316884	E260,A386,T387,E388,E389,N398,A399,A400,D435,C437,C465,A466	E388,E389,N398,A399,C465			E260,E388,N398,C437,C465,A466
T30	CID10382239	S382,G383,A386,T387,N398,A400,N433,V434,D435,S436,C437,C465,A466	A386,T387,N398,D435,A466			A400,V434
T31	CID124079391	G383,A386,T387,N398,A400,N433,V434,D435,S436,C437,D440,C465,A466	A386,T387,N398,N433,D440,A466			T387,A400,V434,S436,C437,C465
T32	CID16745513	I381,S382,G383,A386,T387,E388,N398,A399,A400,N433,D435,S436,C437,D440,C465,A466	G383,T387,E389,A400,N433,D435,C437			T387,E388,N398,A466
T33	CID2754650	A386,T387,E388,E389,N398,A400,N433,D435,C437,D440,C465,A466	E389,N398,D440			T387,E388,A400,C465,A466
T34	CID28681	I381,S382,A386,T387,E388,E389,N398,A399,A400,N433,D435,D440,C465,A466	T387,E389,D440,C465			I381,S382,E388,N398,A399,A400,C465,A466
T35	CID372738	I381,G383,A386,T387,E388,E389,N398,A400,N433,D435,D440,C465,A466,K467	A386,N398,A400,A466			I381,A386,T387,E388,E389,V434,K467
T36	CID44257628	A386,T387,E388,E389,K390,N398,D435,D440,C465,A466,K467	T387,E389,N398,D435,D440			T387,E388,E389,K390,C465,A466,K467
T37	CID493164	E260,A386,T387,E388,N398,A400,V434,D435,S436,C437,D440,A466	E260,E388,N398,C437,D440			T387,A400,V434,A466
T38	CID5486931	E260,I381,A386,T387,E388,N398,A399,A400,N433,V434,D435,C437,D440,A466	E260,I381,N398,A400,C437,D440			E260,I381,T387,E388,A400,V434,A466
T39	CID71453399	E260,I381,S382,A386,T387,N398,A399,A400,N433,V434,D435,C437,A466	I381,A386,T387,N398,A400			E260,T387,N398,A399,V434,A466
T40	CID78411088	S382,G383,A386,T387,N398,A399,A400,N433,V434,D435,C437,D440,A466	G383,A386,N398,A400,D435			E260,T387,N398,V434,A466
T41	CID90473021	E260,I381,S382,A386,T387,E388,E389,N398,A399,A400,N433,D435,S436,D440,C465,A466	N398,A399,A400,D440,C465			E260,I381,S382,E388,S436,D440,A466
T42	CID101589321	I381,S382,G383,G385,A386,T387,E388,N398,A399,A400,N433,V434,D435,D440,C465,A466	I381,S382,T387,E388,N398,A400,N433,D435,D440			V434,D440,C465,A466
T43	CID12305769	G383,G385,A386,T387,E388,E389,N398,N433,D435,D440,C465,A466	G383,T387,E389,N398,D435,C465			T387,E388,N398,D440,C465,A466
T44	CID13994712	E260,I381,A386,T387,N398,A399,A400,N433,D435,C437,D440,A466	T387,A399,A400,N433,D435,A466			E260,I381,S382,T387,N398,A399,C437
T45	CID15071950	E260,A386,T387,N398,N433,V434,D435,S436,C437,D440,A466	E260,T387,N398,V434,D435,S436,D440,A466			E260,N398,V434,S436,C437
T46	CID15689618	G383,G385,T387,E388,E389,N398,A400,D435,D440,C465,A466	G383,T387,E389,N398,C465			E388,A400,D440,A466
T47	CID21723445	E260,A386,T387,N398,A400,N433,V434,D435,S436,C437,C465,A466	A386,T387,N398,D435			E260,N398,A400,V434,A466
T48	CID24360	I381,S382,G385,A386,T387,E388,E389,N398,A399,A400,N433,D435,S436,D440,C465,A466	I381,G385,N398,A400,D435,S436,D440			T387,E388,A399,C465,A466
T49	CID442320	E260,I381,S382,G383,G385,A386,T387,N398,A399,A400,N433,V434,D435,D440	S382,G385,A386,T387,N398,A399,A400,D435,D440			E260,T387,N398,A399,V434,D440
T50	CID44257569	I381,S382,A386,T387,E388,E389,N398,A399,A400,N433,D435,D440,C465,A466	I381,S382,A386,T387,E389,N398,A400,D440,C465			E260,E388,N398,C465,A466
T51	CID44258663	E260,I381,S382,G383,A386,T387,E388,E389,N398,A399,A400,N433,V434,D435,S436,D440,C465,A466	G383,E389,N398,D440,C465			E260,E388,A400,V434,D440,A466
T52	CID44260097	I381,S382,G383,T387,E388,E389,N398,A399,A400,N433,D435,S436,D440,C465,A466	I381,G383,E388,E389,N398,D435,D440			T387,E388,A466
T53	CID467295	I381,S382,T387,E388,E389,N398,A399,A400,N433,V434,D435,S436,C437,D440,C465,A466	I381,S382,T387,E388,E389,N398,C437,D440			T387,E388,N398,A399,A400,V434,D440,C465,A466
T54	CID49769861	G259,E260,A386,T387,E388,E389,N398,A399,A400,N433,V434,D435,C437,C465,A466	E260,A386,E388,E389,N398,D435,C465,A466			T387,A400,V434
T55	CID5319484	G385,A386,T387,E388,E389,N398,A400,N433,V434,D435,C465,A466,K467	A386,T387,E389,N398,V434,D435,A466			E388,E389,K390,N398,C465,K467
T56	CID101316779	G259,E260,S382,G383,G385,A386,T387,E388,N398,A399,A400,N433,V434,D435,D440,A466	E260,G383,G385,A386,N398,N433,D435,D440,A466			E260,A400,V434,C437,D440
T57	CID363127	E260,A386,T387,E388,E389,N398,A400,V434,D435,C437,D440,C465,A466	E388,E389,C437,A466			T387,E388,N398,V434,S436,C437
T58	CID5245667	T387,E388,E389,N398,A400,N433,D435,D440,C465,A466	E388,A400			T387,E388,N398,C465,A466
T59	CID5273807	E260,A386,T387,E388,N398,A400,N433,V434,D435,S436,C437,D440,A466	E260,N398,N433,C437,D440			T387,E388,A400,V434,A466
T60	CID5280441	I381,S382,G383,G385,A386,T387,E388,E389,N398,A399,A400,N433,D435,D440,C465,A466	S382,G383,A386,T387,E389,N398,A399,A400,D435,C465			E260,T387,E388,C465,A466
T61	CID5491526	G385,A386,T387,E388,E389,N398,A400,N433,V434,D435,D440,C465,A466	T387,E388,E389,N398,A400,V434			T387,E388,N398,A466
T62	CID568919	I381,A386,T387,E388,N398,A399,A400,N433,V434,D435,S436,C437,D440,C465,A466	I381,N398,A400,D435,C437,D440			I381,S382,T387,E388,N398,A399,A400,V434,C437,A466
T63	CID6419835	G383,G385,T387,E388,E389,N398,A400,N433,V434,D435,D440,C465,A466	G383,E388,E389,N398,A400,D440,C465			T387,E388,N398,V434,D440,C465,A466
T64	CID697545	G383,T387,E388,E389,N398,A400,D435,D440,C465,A466	T387,E388			T387,E388,N398,A400,C465,A466
T65	CID72276	S382,G383,G385,A386,T387,E388,E389,N398,N433,V434,D435,D440,C465,A466	G383,G385,A386,E388,E389,N398,N433,D435			T387,N398,D440,A466
T66	CID72277	I381,S382,G383,G385,A386,T387,E388,E389,N398,A400,N433,V434,D435,D440,C465,A466	I381,G383,G385,A386,E388,E389,N398,A400,D435,D440			T387,N398,D440,A466
T67	CID821351	A386,T387,E388,N398,A400,N433,V434,D435,C437,D440,A466	A386,A400,D440			T387,E388,N398,V434,C437,A466
T68	CID97174	E260,A386,T387,N398,A399,A400,N433,V434,D435,D440,A466	T387,A399,A400,N433			E260,T387,N398,A399,A400,V434,A466
T69	CID97679	A386,T387,E388,E389,N398,A400,N433,D435,C437,D440,C465,A466	E388,E389,N398			T387,E388,A400,C437,D440,A466
T70	CID10021410	G259,E260,A386,T387,E388,N398,A399,A400,N433,D435,C437,D440,C465,A466	E260,A386,N398,A400,C437			T387,E388,D440,C465,A466
T71	CID101253695	E260,I381,S382,G383,A386,T387,E388,E389,N398,A400,D435,C437,D440,C465,A466	E388,E389,D435,C437,D440,C465			E260,S382,N398,A400,A466
T72	CID101685340	E260,A386,T387,N398,A399,A400,V434,D435,D440	T387,N398,A399,A400,D435			E260,T387,N398,A399,V434
T73	CID102067319	A386,T387,N398,A400,N433,V434,D435,S436,C437,C465,A466	T387,N398,D435			N398,A400,V434,A466
T74	CID10523159	I381,S382,G383,T387,E388,E389,N398,A399,A400,N433,D435,S436,C437,D440,C465,A466	T387,E388,E389,N398,A400,N433,C437,D440			T387,E388,N398,A466
T75	CID11537197	E260,A386,T387,E388,E389,N398,A399,A400,D435,S436,C437,D440,C465,A466	E260,E389,N398,A399,N433,S436,C437,D440			E260,T387,E388,N398,A400,C465,A466
T76	CID11982272	E260,A386,T387,E388,E389,N398,A400,N433,V434,D435,C437,C465,A466	T387,E389,A400,N433,D435,C437,C465			E260,T387,E388,V434,A466
T77	CID12314414	E260,A386,T387,E388,E389,N398,A399,A400,N433,V434,D435,C437,C465,A466	A386,N398,A399,N433,C437,A466			E260,E388,N398,A399,A400,V434
T78	CID13747828	S382,G383,T387,E388,E389,N398,A399,A400,V434,D435,D440,C465,A466	G383,T387,N398,A400,V434,D435			E388,D435,A466
T79	CID14237664	E260,I381,G383,T387,E388,E389,N398,A399,A400,N433,D435,S436,D440,C465,A466,K467	E260,G383,E389,N398,D435,S436,D440			I381,T387,E388,N398,A399,A400,C465,A466,K467
T80	CID165547	E260,I381,S382,G383,A386,T387,N398,A399,A400,V434,D435,D440	I381,G383,T387,N398,A400,D435,D440			E260,T387,N398,A400,V434
T81	CID169996	S382,G383,G385,A386,T387,E388,E389,N398,N433,V434,D435,C437,D440,C465,A466	G385,A386,E388,E389,N398,D435			T387,N398,A400,D440,A466
T82	CID185756	I381,G385,A386,T387,E388,E389,N398,A399,A400,N433,V434,D435,C437,D440,C465,A466	I381,T387,E388,E389,N398,A400,N433,D435,D440			T387,E388,N398,A399,V434,A466
T83	CID21123660	E260,I381,S382,G383,T387,N398,A400,N433,D435,S436,D440	S382,T387,N398,D435			E260,I381,N398,A399,A400,S436,D440
T84	CID21586648	I381,S382,G383,G385,T387,E388,E389,N398,A399,A400,N433,D435,S436,D440,C465,A466	S382,N398,D435,S436,D440			E388,N398,A400,C465,A466
T85	CID21629801	I381,S382,G383,G385,A386,T387,E388,E389,N398,A399,A400,N433,V434,D435,S436,C437,D440,C465,A466	S382,G383,T387,N398,N433,V434,C437,D440,C465			T387,E388,N398,A399,A400,D440,A466
T86	CID21721881	I381,S382,G383,G385,A386,T387,E388,E389,N398,A400,N433,D435,D440,C465,A466	I381,G383,G385,A386,E388,E389,N398,A400,D435,C465			T387,E388,N398,D440,A466
T87	CID21722946	S382,G383,T387,E388,E389,N398,A399,A400,N433,V434,D435,D440,C465,A466	G383,T387,E388,E389,A400,N433,V434,D435,C465			T387,N398,A466
T88	CID251890	A386,T387,N398,A400,N433,V434,D435,S436,C437,C465,A466	A386,T387,N398,N433,D435			N398,A400,V434,C437,A466
T89	CID325518	E260,A386,T387,E388,N398,A399,A400,N433,D435,S436,C437,D440,C465,A466	T387,A400,N433,D435,S436,C437,A466			E260,T387,E388,N398,A399,V434
T90	CID438692	E260,A386,T387,E388,N398,A399,A400,N433,V434,D435,S436,C437,D440,A466	T387,N398,C437			E260,E388,A400,V434,S436,C437,A466
T91	CID492901	E260,A386,T387,E388,N398,A400,N433,V434,D435,C437,D440,A466	E260,N398,N433,D440			T387,E388,V434,C437,A466
T92	CID5276454	E260,S382,G383,G385,A386,T387,E388,E389,N398,A400,N433,V434,D435,D440,C465,A466	E260,G383,G385,E388,E389,N398,A400,V434,D435,D440,C465			E260,T387,E388,N398,D440,C465,A466
T93	CID5318717	G383,G385,A386,T387,E388,E389,N398,A400,N433,V434,D435,D440,C465,A466	T387,E388,E389,N398,D440,C465			T387,E388,V434,A466
T94	CID5748205	E260,I381,S382,G383,G385,A386,T387,E388,N398,A399,A400,N433,D435,D440,A466	S382,A386,T387,N398,A399,A400,N433,D435,D440			E260,E388,D440,A466
T95	CID66868	E260,A386,T387,E388,N398,A400,N433,D435,C437,D440,C465,A466	D440			E260,T387,E388,N398,A400,S436,C437,C465,A466
T96	CID91741938	E260,I381,S382,G383,T387,N398,A400,N433,D435,S436,D440	S382,T387,N398,N433,D435			E260,I381,T387,N398,A400,V434,S436,D440

## Sheet: Table S5
Table S5: The table lists the ligand binding site residues and non-covalent protein-ligand interactions namely, Hydrogen bond interactions, π-π stacking interactions of face-to-face type and face-to-edge type and Hydrophobic interactions that were identified from the docked protein-ligand complexes of the top 9 phytochemical inhibitors of cathepsin L.
Phytochemical symbol	PubChem identifier	Binding site residues	Hydrogen bond interaction residues	π-π stacking face-to-face interaction residues	π-π stacking face-to-edge interaction residues	Hydrophobic interaction residues
C1	CID438692	Q19,G20,C22,G23,C25,A138,G139,H140,L144,D162,H163,W189	Q19,A138	W189	W189	C25,G139,L144,H163,W189
C2	CID189308	Q19,G20,C25,A138,G139,H140,H163,W189	Q19,G20,H163,W189		W189	G139,H140,H163,W189
C3	CID76326662	G20,Q21,C22,G23,C25,N66,G68,L69,M70,A135,M161,D162,H163,W189	G23,C25,M70,M161,D162,H163			Q21,C22,L69,M70,A135,W189
C4	CID102151885	G23,C25,W26,E63,N66,G67,G68,L69,M70,A135,A138,M161,D162,H163,G164,W189,A214	G68,L69,M70,A138,D162		W189	G23,C25,G67,M70,A135,A138,D162,H163,G164,W189,A214
C5	CID442120	Q19,G23,C25,G68,L69,Y72,M161,D162,H163	Q19,G68,H163			G23,C25,G67,G68,L69,Y72
C6	CID161453	Q19,G20,G23,C25,N66,L144,D162,H163,W189	G20,C25,N66,L144,H163	W189	W189	G23,L144,W189
C7	CID42608131	Q19,G20,Q21,G23,C25,N66,A138,G139,L144,D162,H163,W189	Q21,A138,G139,H163,W189		W189	G23,A138,L144,H163,W189
C8	CID5320555	Q19,C22,G23,C25,N66,G68,L69,M70,A138,M161,D162,H163,G164,W189	G23,G68,M70,D162		W189	G23,L69,D162,W189
C9	CID90473021	G20,Q21,G23,C25,C65,N66,L144,D162,H163,W189	Q21,N66,D162,H163,W189		W189	Q21,G23,C25,L144,W189

## Sheet: Table S6
Table S6: ADMET properties of the top list of 96 potential phytochemical inhibitors of TMPRSS2. For each phytochemical, the table gives the symbol, Pubchem identifier; several physicochemical properties such as Molecular weight in g/mol, LogP (Partition coefficient), MolarRefractivity, TPSA (Topological Surface Area) in Å², Number of hydrogen bond acceptors, Number of hydrogen bond donors, Total …
Phytochemical symbol	PubChem identifier	Physicochemical properties										Drug-likeness properties					Absorption and Distribution								Metabolism														Toxicity
		Molecular weight (g/mol)	LogP	Molar Refractivity	TPSA (Å²)	Number of hydrogen bond donors	Number of hydrogen bond acceptors	Total number of Atoms	Number of rotatable bonds	Shape complexity	Stereochemical complexity	Lipinski RO5 filter	QEDw	QEDuw	Leadlikeness, number of violations predicted by SwissADME	Synthetic accessibility predicted by SwissADME	Solubility class predicted by SwissADME using ESOL method	Solubility class predicted by SwissADME using method by Ali et al	Solubility class predicted by SwissADME using Silicos-IT	Gasterointestinal absorption predicted by SwissADME	Skin permeation predicted by SwissADME (log Kp cm/s)	Blood Brain Barrier permeation predicted by SwissADME	Blood Brain Barrier permeation predicted by vNNADMET	Bioavailability Score predicted by SwissADME	P-glycoprotein substrate predicted by SwissADME	P-glycoprotein substrate predicted by vNNADMET	P-glycoprotein inhibitor predicted by vNNADMET	Cytochrome P450 1A2 inhibitor predicted by SwissADME	Cytochrome P450 1A2 inhibitor predicted by vNNADMET	Cytochrome P450 2C19 inhibitor predicted by SwissADME	Cytochrome P450 2C19 inhibitor predicted by vNNADMET	Cytochrome P450 2C9 inhibitor predicted by SwissADME	Cytochrome P450 2C9 inhibitor predicted by vNNADMET	Cytochrome P450 2D6 inhibitor predicted by SwissADME	Cytochrome P450 2D6 inhibitor predicted by vNNADMET	Cytochrome P450 3A4 inhibitor predicted by SwissADME	Cytochrome P450 3A4 inhibitor predicted by vNNADMET	Human liver microsomal stability predicted by vNNADMET (HLM)	PAINS:Number of alerts predicted by SwissADME	Brenk:Number of alerts predicted by SwissADME	Drug-induced liver injury predicted by vNNADMET (DILI)	Cytotoxicity predicted by vNNADMET	hERG Blocker predicted by vNNADMET	Mitochondrial toxicity predicted by vNNADMET (MMP)	Mutagenecity predicted by vNNADMET (AMES)
T1	CID5320815	363.376	3.1364	109.495	63.47	1	5	41	0	0	0	Passed	0.459124	0.478353	2	3.3	Moderately soluble	Moderately soluble	Poorly soluble	High	-5.93	Yes	Yes	0.55	No	No	No	Yes	No	No	No	No	No	No	No	No	No	Yes	0	0	Yes	No	Yes	Yes	Yes
T2	CID101835682	468.414	1.4783	118.61	159.8	4	10	54	3	0.25	0.21	Passed	0.324335	0.230909	1	5.4	Soluble	Moderately soluble	Moderately soluble	Low	-8.09	No	No	0.55	No	No	No	No	No	No	No	No	No	No	No	No	No	Yes	0	1	Yes	No	No	No	Yes
T3	CID120734	367.357	2.5847	92.3615	66.46	0	7	44	1	0.35	0.1	Passed	0.717905	0.696827	1	3.88	Moderately soluble	Soluble	Moderately soluble	High	-6.69	Yes	No	0.55	No	No	Yes	Yes	No	Yes	Yes	Yes	Yes	Yes	No	Yes	Yes	Yes	0	0	No	No	No	No	No
T4	CID102067318	380.444	1.4211	101.123	62.24	1	5	52	0	0.59	0.27	Passed	0.747024	0.78363	1	5.36	Soluble	Soluble	Soluble	High	-7.35	No	No	0.55	No	Yes	Yes	No	No	No	No	No	No	Yes	No	No	No	Yes	0	1	No	No	Yes	No	No
T5	CID10237	367.357	2.5847	92.3615	66.46	0	7	44	1	0.35	0.1	Passed	0.717905	0.696827	1	3.88	Moderately soluble	Soluble	Moderately soluble	High	-6.69	Yes	No	0.55	No	No	Yes	Yes	No	Yes	Yes	Yes	Yes	Yes	No	Yes	Yes	Yes	0	0	No	No	No	No	No
T6	CID73393	350.418	2.1051	95.1974	52.6	0	3	48	-1	0.57	0.29	Passed	0.409057	0.58139	1	5.25	Soluble	Soluble	Soluble	High	-7.4	Yes	Yes	0.55	No	Yes	No	No	No	No	No	No	No	Yes	No	No	No	Yes	0	2	Yes	No	Yes	No	No
T7	CID12303796	364.445	2.1011	99.961	42.01	0	4	51	0	0.59	0.27	Passed	0.716024	0.774834	1	5.24	Soluble	Soluble	Soluble	High	-7.17	Yes	No	0.55	No	Yes	Yes	No	No	No	No	No	No	Yes	No	No	No	Yes	0	1	No	No	Yes	No	No
T8	CID189685	369.373	2.4354	92.9908	69.62	1	7	46	1	0.4	0.15	Passed	0.827898	0.76496	1	4.16	Soluble	Soluble	Soluble	High	-7.24	No	No	0.55	No	No	Yes	Yes	No	No	Yes	No	Yes	Yes	No	Yes	Yes	Yes	0	0	No	No	No	No	No
T9	CID21680050	380.444	1.8067	101.626	62.24	1	5	52	0	0.59	0.27	Passed	0.753225	0.790561	1	5.32	Soluble	Very soluble	Soluble	High	-8.16	Yes	No	0.55	No	Yes	No	No	No	No	No	No	No	Yes	No	No	No	Yes	0	1	No	No	No	No	No
T10	CID14309762	368.341	3.178	97.5094	113.27	3	7	43	1	0.25	0.05	Passed	0.472762	0.420045	2	4	Moderately soluble	Moderately soluble	Moderately soluble	High	-6.03	No	No	0.55	No	Yes	No	Yes	No	No	No	Yes	No	Yes	No	Yes	No	Yes	0	0	Yes	Yes	No	Yes	No
T11	CID441071	334.419	2.0925	93.409	32.78	0	3	47	-1	0.57	0.29	Passed	0.681317	0.745814	0	5.1	Soluble	Soluble	Soluble	High	-6.97	Yes	Yes	0.55	No	Yes	No	Yes	No	No	No	No	No	Yes	No	No	No	Yes	0	1	Yes	No	Yes	No	No
T12	CID5459059	351.358	2.4809	89.593	49.39	0	6	43	0	0.4	0.15	Passed	0.726843	0.73228	1	4.8	Moderately soluble	Soluble	Moderately soluble	High	-6.58	Yes	Yes	0.55	No	Yes	Yes	Yes	No	Yes	Yes	No	No	Yes	Yes	Yes	Yes	Yes	0	0	No	No	No	No	Yes
T13	CID76326662	466.629	5.6562	142.026	56.08	3	3	69	4	0.4	0.13	Passed	0.340466	0.383683	2	4.89	Moderately soluble	Moderately soluble	Poorly soluble	High	-5.67	Yes	No	0.55	No	Yes	No	No	No	No	No	No	No	No	No	No	No	No	1	1	No	No	No	No	No
T14	CID101277371	364.445	1.9092	100.552	49.85	0	4	51	-1	0.55	0.23	Passed	0.66014	0.731014	1	5.57	Soluble	Very soluble	Soluble	High	-8.32	Yes	Yes	0.55	No	No	No	No	No	No	No	No	No	Yes	No	No	No	Yes	0	1	No	No	No	No	No
T15	CID101282059	352.434	1.0469	96.7616	64.01	2	4	50	0	0.57	0.29	Passed	0.741799	0.792387	1	4.81	Soluble	Very soluble	Soluble	High	-7.84	No	Yes	0.55	Yes	Yes	Yes	No	No	No	No	No	No	Yes	No	No	No	Yes	0	1	Yes	No	Yes	No	No
T16	CID101595	380.444	1.6148	102.217	70.08	1	5	52	-1	0.55	0.23	Passed	0.692864	0.738131	1	5.64	Soluble	Very soluble	Soluble	High	-8.67	No	Yes	0.55	Yes	Yes	No	No	No	No	No	No	No	Yes	No	No	No	Yes	0	1	No	No	No	No	No
T17	CID210990	380.444	1.0241	102.012	70.08	1	5	52	-1	0.55	0.23	Passed	0.680967	0.724638	1	5.66	Very soluble	Very soluble	Soluble	High	-9.19	No	Yes	0.55	Yes	No	No	No	No	No	No	No	No	No	No	No	No	Yes	0	1	No	No	Yes	No	No
T18	CID211181	350.418	1.7981	95.0738	53.01	1	4	48	-1	0.57	0.29	Passed	0.725201	0.787438	1	5.17	Soluble	Soluble	Soluble	High	-7.32	Yes	Yes	0.55	Yes	Yes	No	No	No	No	No	No	No	Yes	No	No	No	Yes	0	1	No	No	No	No	No
T19	CID21723446	350.418	1.4125	94.5708	53.01	1	4	48	-1	0.57	0.29	Passed	0.719174	0.780469	1	5.22	Soluble	Soluble	Soluble	High	-7.15	Yes	Yes	0.55	Yes	No	No	No	No	No	No	No	No	Yes	No	No	No	Yes	0	1	No	No	No	No	No
T20	CID5257090	261.288	2.7553	79.0381	80.48	2	4	31	1	0	0	Passed	0.551774	0.560127	0	2.42	Soluble	Soluble	Poorly soluble	High	-6.51	No	Yes	0.55	Yes	No	No	Yes	Yes	No	No	No	No	Yes	No	Yes	No	Yes	0	0	Yes	No	No	No	Yes
T21	CID5386368	490.417	0.0816	116.655	177.51	5	12	57	5	0.35	0.22	Passed	0.325895	0.205529	1	5.47	Soluble	Moderately soluble	Soluble	Low	-8.58	No	No	0.55	No	No	No	No	No	No	No	No	No	No	No	Yes	No	Yes	0	0	Yes	No	No	No	Yes
T22	CID100947536	374.348	3.189	98.9356	108.74	2	6	42	2	0.09	0	Passed	0.835604	0.769287	2	3.26	Moderately soluble	Moderately soluble	Moderately soluble	High	-5.97	No	No	0.55	No	No	No	Yes	Yes	No	Yes	Yes	No	No	Yes	Yes	No	Yes	2	0	No	No	No	Yes	Yes
T23	CID10185	304.254	1.1863	73.2495	127.45	5	7	34	1	0.13	0.13	Passed	0.500531	0.469469	0	3.51	Soluble	Soluble	Soluble	High	-7.48	No	No	0.55	No	No	No	No	No	No	No	No	No	No	No	No	Yes	Yes	1	1	No	No	Yes	Yes	No
T24	CID124069	333.343	3.914	93.737	40.16	0	5	40	0	0.2	0	Passed	0.623628	0.642958	1	3.02	Moderately soluble	Moderately soluble	Poorly soluble	High	-5.41	Yes	Yes	0.55	Yes	Yes	No	Yes	Yes	Yes	Yes	Yes	No	No	No	Yes	Yes	Yes	0	0	Yes	No	No	No	Yes
T25	CID42607801	418.398	0.3192	101.25	156.91	6	9	52	3	0.38	0.29	Passed	0.412956	0.316344	1	4.89	Soluble	Soluble	Soluble	Low	-9.04	No	No	0.55	No	No	No	No	No	No	No	No	No	No	No	No	No	Yes	0	0	No	No	No	No	Yes
T26	CID5378771	370.357	2.6512	97.3322	120.36	4	7	45	2	0.25	0.05	Passed	0.547182	0.48944	1	4	Moderately soluble	Moderately soluble	Moderately soluble	High	-6.66	No	No	0.55	No	No	No	No	No	No	Yes	Yes	No	Yes	No	Yes	No	Yes	0	0	Yes	No	No	Yes	No
T27	CID609840	369.373	2.4354	92.9908	69.62	1	7	46	0	0.4	0.15	Passed	0.764819	0.720597	1	4.29	Soluble	Soluble	Soluble	High	-7.24	No	No	0.55	No	No	Yes	Yes	No	No	Yes	No	Yes	Yes	No	No	Yes	Yes	0	0	No	No	No	No	Yes
T28	CID101041139	364.309	3.1255	92.0053	83.45	1	7	39	1	0.15	0.05	Passed	0.66432	0.623055	1	3.46	Moderately soluble	Moderately soluble	Moderately soluble	High	-6.18	No	No	0.55	No	No	No	Yes	Yes	Yes	Yes	Yes	No	No	No	Yes	Yes	Yes	0	0	Yes	No	No	No	Yes
T29	CID101316884	354.358	2.7349	92.2598	66.38	1	6	44	3	0.3	0.1	Passed	0.914287	0.870925	1	4.05	Soluble	Soluble	Moderately soluble	High	-6.52	Yes	Yes	0.55	No	Yes	Yes	Yes	No	Yes	No	Yes	No	Yes	No	Yes	Yes	Yes	0	0	Yes	No	Yes	No	Yes
T30	CID10382239	334.419	1.9962	95.3478	43.78	1	3	47	0	0.48	0.19	Passed	0.799091	0.855786	0	4.96	Soluble	Very soluble	Soluble	High	-8.03	Yes	Yes	0.55	Yes	Yes	Yes	No	No	No	No	No	No	Yes	No	No	No	Yes	0	1	Yes	No	Yes	No	No
T31	CID124079391	350.418	2.0088	97.1362	63.6	1	3	48	0	0.48	0.19	Passed	0.478712	0.655123	1	5.12	Soluble	Very soluble	Soluble	High	-8.46	No	Yes	0.55	Yes	Yes	No	No	No	No	No	No	No	No	No	No	No	Yes	0	2	Yes	No	Yes	No	No
T32	CID16745513	370.357	2.5376	90.6358	75.61	1	7	45	2	0.4	0.25	Passed	0.870588	0.790867	1	4.36	Soluble	Soluble	Soluble	High	-7.03	No	Yes	0.55	No	Yes	Yes	Yes	Yes	No	Yes	No	Yes	Yes	No	No	Yes	Yes	0	0	No	No	No	No	No
T33	CID2754650	288.302	4.3076	85.9851	57.53	2	3	34	1	0	0	Passed	0.701263	0.729126	1	3.18	Moderately soluble	Moderately soluble	Moderately soluble	High	-5	Yes	No	0.55	No	No	Yes	Yes	No	No	No	No	No	Yes	No	No	No	Yes	0	0	Yes	No	No	Yes	No
T34	CID28681	346.382	5.09924	103.023	80.92	4	4	44	1	0.09	0	Passed	0.386474	0.409543	1	2.37	Poorly soluble	Poorly soluble	Poorly soluble	High	-3.83	No	Yes	0.55	No	No	No	No	No	Yes	Yes	Yes	Yes	Yes	No	No	No	Yes	0	0	Yes	No	No	Yes	Yes
T35	CID372738	448.427	4.3648	119.038	107.59	2	8	53	4	0.16	0.08	Passed	0.474113	0.398333	2	4.78	Moderately soluble	Poorly soluble	Poorly soluble	High	-6.02	No	Yes	0.55	No	No	Yes	No	Yes	No	Yes	Yes	Yes	No	No	Yes	No	Yes	0	0	No	No	Yes	Yes	No
T36	CID44257628	430.365	0.4366	104.53	166.89	5	9	49	4	0.24	0.24	Passed	0.391666	0.267761	1	5.03	Soluble	Moderately soluble	Soluble	Low	-7.89	No	Yes	0.11	Yes	No	No	No	No	No	No	No	No	No	No	No	No	Yes	0	0	Yes	No	No	Yes	No
T37	CID493164	364.309	3.3402	92.4143	83.45	1	7	39	1	0.15	0	Passed	0.663146	0.621882	1	3.06	Moderately soluble	Moderately soluble	Moderately soluble	High	-6.04	No	No	0.55	No	No	No	Yes	Yes	Yes	Yes	Yes	No	Yes	No	Yes	Yes	Yes	0	0	Yes	No	No	No	No
T38	CID5486931	368.388	5.4902	108.017	67.51	1	4	44	1	0.08	0	Passed	0.424728	0.429531	2	3.73	Poorly soluble	Poorly soluble	Poorly soluble	High	-4.02	No	Yes	0.55	No	Yes	Yes	Yes	No	No	No	Yes	No	No	No	No	No	Yes	0	0	Yes	No	No	Yes	Yes
T39	CID71453399	394.471	1.8833	106.504	59.08	0	5	55	0	0.57	0.22	Passed	0.728068	0.756815	1	5.83	Soluble	Very soluble	Moderately soluble	High	-8.73	Yes	Yes	0.55	No	Yes	No	No	No	No	No	No	No	Yes	No	No	No	Yes	0	0	No	No	Yes	No	No
T40	CID78411088	307.349	3.0841	85.537	38.77	0	3	40	0	0.32	0.05	Passed	0.750576	0.801033	0	3.47	Soluble	Soluble	Moderately soluble	High	-6.22	Yes	Yes	0.55	Yes	No	No	Yes	No	Yes	No	Yes	No	Yes	No	Yes	Yes	Yes	0	0	No	No	Yes	No	Yes
T41	CID90473021	516.417	2.1972	147.65	163.11	3	9	51	0	0	0	Passed	0.202526	0.175637	2	2.58	Poorly soluble	Poorly soluble	Poorly soluble	Low	-5.33	No	No	0.55	No	No	Yes	No	Yes	No	Yes	No	No	No	No	Yes	No	Yes	0	2	No	No	No	Yes	Yes
T42	CID101589321	408.447	-0.1884	100.261	125.68	4	8	57	3	0.67	0.48	Passed	0.287724	0.315814	1	5.69	Soluble	Soluble	Soluble	High	-8.86	No	No	0.55	Yes	No	No	No	No	No	No	No	No	No	No	No	No	Yes	0	2	No	No	No	No	No
T43	CID12305769	304.254	1.0154	73.1555	127.45	5	7	34	2	0.13	0.07	Passed	0.523894	0.48497	0	3.16	Soluble	Moderately soluble	Soluble	High	-6.86	No	No	0.55	Yes	Yes	No	No	Yes	No	No	No	No	No	No	No	No	Yes	1	1	No	No	No	Yes	Yes
T44	CID13994712	382.46	1.6671	103.237	62.24	1	5	54	1	0.59	0.27	Passed	0.748959	0.786577	1	5.38	Soluble	Very soluble	Soluble	High	-8.12	Yes	Yes	0.55	No	Yes	Yes	No	No	No	No	No	No	Yes	No	No	No	Yes	0	1	No	No	No	No	No
T45	CID15071950	331.324	1.0555	81.4227	88.05	1	6	41	0	0.47	0.24	Passed	0.330902	0.477831	0	4.5	Soluble	Very soluble	Soluble	High	-8.15	No	No	0.55	Yes	No	No	No	No	No	No	No	No	No	Yes	No	No	Yes	0	2	No	No	No	No	No
T46	CID15689618	442.376	2.1765	107.353	177.14	7	10	50	4	0.14	0.09	Passed	0.180644	0.166508	1	4.05	Soluble	Moderately soluble	Soluble	Low	-8.25	No	No	0.55	No	Yes	No	No	No	No	No	No	No	No	No	No	No	Yes	1	2	Yes	No	Yes	No	No
T47	CID21723445	364.445	2.0666	99.361	42.01	0	4	51	0	0.59	0.27	Passed	0.715734	0.7745	1	5.39	Soluble	Soluble	Soluble	High	-6.85	Yes	Yes	0.55	No	No	No	No	No	No	No	No	No	Yes	No	No	No	Yes	0	1	No	No	No	No	No
T48	CID24360	348.358	2.0796	94.5248	81.42	1	6	42	1	0.25	0.05	Passed	0.532764	0.54126	0	3.84	Soluble	Soluble	Moderately soluble	High	-7.19	No	No	0.55	Yes	No	No	Yes	No	No	No	Yes	No	No	No	Yes	No	Yes	0	0	No	Yes	No	No	Yes
T49	CID442320	408.447	-0.1884	100.261	125.68	4	8	57	3	0.67	0.48	Passed	0.287724	0.315814	1	5.69	Soluble	Very soluble	Soluble	High	-8.98	No	No	0.55	Yes	No	No	No	No	No	No	No	No	No	No	No	No	Yes	0	2	No	No	No	No	No
T50	CID44257569	416.382	0.3861	103.97	160.82	6	9	50	3	0.29	0.24	Passed	0.354663	0.267457	1	5.08	Soluble	Soluble	Soluble	Low	-8.83	No	No	0.55	No	No	No	No	No	No	No	No	No	No	No	No	No	Yes	0	0	No	No	No	No	Yes
T51	CID44258663	436.46	4.6018	118.866	120.36	4	7	56	2	0.32	0.04	Passed	0.433317	0.411053	2	4.75	Moderately soluble	Poorly soluble	Poorly soluble	Low	-5.63	No	No	0.55	No	Yes	No	No	Yes	No	Yes	Yes	Yes	No	No	No	No	Yes	0	1	Yes	No	No	Yes	Yes
T52	CID44260097	368.341	3.178	97.5094	113.27	3	7	43	1	0.25	0.05	Passed	0.472762	0.420045	2	4.08	Moderately soluble	Moderately soluble	Moderately soluble	High	-6.03	No	No	0.55	No	Yes	No	Yes	No	No	No	Yes	No	Yes	No	Yes	No	Yes	0	0	Yes	No	No	Yes	Yes
T53	CID467295	426.377	2.822	105.591	156.91	6	9	49	4	0.14	0.09	Passed	0.27364	0.243934	1	4.1	Soluble	Moderately soluble	Soluble	Low	-7.57	No	No	0.55	No	No	No	No	No	No	No	No	No	No	No	No	No	Yes	1	1	Yes	No	Yes	No	No
T54	CID49769861	313.309	1.8047	80.7287	101.23	4	5	38	-1	0.24	0.06	Passed	0.555669	0.595605	0	2.86	Soluble	Soluble	Soluble	High	-6.71	No	No	0.55	Yes	Yes	No	Yes	No	No	No	No	No	No	No	No	No	Yes	1	1	No	No	No	No	Yes
T55	CID5319484	446.364	0.1422	106.195	187.12	6	10	50	4	0.24	0.24	Passed	0.319947	0.202754	1	5.06	Soluble	Moderately soluble	Soluble	Low	-7.99	No	No	0.11	Yes	No	No	No	No	No	No	No	No	No	No	No	No	Yes	0	0	Yes	No	No	Yes	No
T56	CID101316779	334.324	1.0859	82.9908	130.61	6	7	42	3	0.29	0.24	Passed	0.463188	0.435812	0	3.79	Soluble	Soluble	Soluble	High	-8.01	No	No	0.55	No	Yes	No	No	No	No	No	No	No	No	No	No	No	Yes	1	1	No	No	No	No	Yes
T57	CID363127	348.31	3.6346	90.7495	63.22	0	6	38	1	0.15	0	Passed	0.6259	0.634523	1	2.94	Moderately soluble	Moderately soluble	Poorly soluble	High	-5.69	Yes	No	0.55	Yes	No	No	Yes	Yes	Yes	Yes	Yes	No	No	Yes	Yes	Yes	Yes	0	0	Yes	No	No	No	No
T58	CID5245667	335.315	2.682	89.594	58.92	0	6	38	0	0.21	0	Passed	0.632103	0.655653	0	3.1	Moderately soluble	Soluble	Moderately soluble	High	-6.35	Yes	No	0.55	No	No	Yes	Yes	Yes	No	No	Yes	No	No	No	Yes	Yes	Yes	0	0	Yes	No	No	No	Yes
T59	CID5273807	364.309	3.3402	92.4143	83.45	1	7	39	1	0.15	0	Passed	0.663146	0.621882	1	3.07	Moderately soluble	Moderately soluble	Moderately soluble	High	-6.04	No	No	0.55	No	No	Yes	Yes	Yes	Yes	Yes	Yes	No	Yes	No	Yes	Yes	Yes	0	0	Yes	No	No	No	No
T60	CID5280441	432.381	0.0917	105.635	181.05	7	10	51	3	0.29	0.24	Passed	0.299596	0.205473	1	5.12	Soluble	Soluble	Soluble	Low	-8.79	No	No	0.55	No	No	No	No	No	No	No	No	No	No	No	No	No	Yes	0	0	Yes	No	No	Yes	No
T61	CID5491526	338.271	3.1029	88.3716	110.11	2	7	35	2	0	0	Passed	0.426633	0.422895	0	3.37	Moderately soluble	Moderately soluble	Moderately soluble	High	-6.29	No	No	0.55	No	No	Yes	Yes	No	No	No	No	No	No	No	No	No	Yes	1	2	Yes	No	No	No	No
T62	CID568919	316.4	5.6047	94.336	18.46	0	2	44	3	0.18	0.09	Passed	0.625501	0.597529	1	3.73	Moderately soluble	Moderately soluble	Poorly soluble	High	-4.86	Yes	Yes	0.55	Yes	Yes	No	Yes	No	Yes	No	No	No	Yes	No	No	No	Yes	0	0	No	No	No	No	Yes
T63	CID6419835	442.376	2.5276	107.256	177.14	7	10	50	4	0.14	0.09	Passed	0.235487	0.191178	1	4.16	Soluble	Moderately soluble	Soluble	Low	-7.91	No	No	0.55	No	Yes	No	No	No	No	No	No	No	No	No	No	No	Yes	1	1	Yes	No	Yes	No	No
T64	CID697545	323.348	2.7995	85.689	40.16	0	5	41	0	0.37	0.05	Passed	0.74548	0.770756	0	3.5	Moderately soluble	Soluble	Moderately soluble	High	-6.16	Yes	Yes	0.55	No	No	No	Yes	Yes	Yes	Yes	No	No	Yes	Yes	Yes	Yes	Yes	0	0	No	Yes	No	Yes	Yes
T65	CID72276	290.271	1.5461	72.623	110.38	5	6	35	1	0.2	0.13	Passed	0.509593	0.523444	0	3.5	Soluble	Soluble	Soluble	High	-7.82	No	No	0.55	Yes	Yes	No	No	No	No	No	No	No	No	No	No	No	Yes	1	1	No	No	Yes	No	No
T66	CID72277	306.27	1.2517	74.2878	130.61	6	7	36	1	0.2	0.13	Passed	0.437094	0.417849	0	3.53	Soluble	Soluble	Soluble	High	-8.17	No	No	0.55	No	No	No	No	No	No	No	No	No	No	No	No	No	Yes	1	1	Yes	No	Yes	No	No
T67	CID821351	309.321	2.5539	82.2757	48.95	1	5	38	0	0.33	0.06	Passed	0.810297	0.828213	0	3.59	Soluble	Soluble	Moderately soluble	High	-6.31	Yes	Yes	0.55	Yes	No	No	Yes	No	Yes	No	No	No	Yes	No	Yes	No	Yes	0	0	No	No	No	No	Yes
T68	CID97174	386.45	5.7394	116.319	34.14	0	2	48	1	0.07	0	Passed	0.418024	0.431002	2	3.77	Poorly soluble	Poorly soluble	Insoluble	High	-4.35	Yes	No	0.55	No	No	No	Yes	Yes	No	No	No	No	No	No	No	No	Yes	0	0	Yes	No	No	Yes	No
T69	CID97679	317.3	3.9986	89.001	49.81	0	5	35	0	0.11	0	Passed	0.458846	0.487647	1	2.47	Moderately soluble	Moderately soluble	Poorly soluble	High	-5.17	Yes	Yes	0.55	Yes	Yes	No	Yes	Yes	Yes	Yes	Yes	No	No	No	Yes	Yes	Yes	0	1	Yes	No	No	No	Yes
T70	CID10021410	360.365	4.1303	101.354	72.83	1	5	43	3	0.09	0	Passed	0.76022	0.745601	2	3.28	Moderately soluble	Moderately soluble	Poorly soluble	High	-5.57	Yes	Yes	0.56	No	Yes	Yes	Yes	Yes	Yes	Yes	Yes	No	No	No	Yes	No	Yes	1	0	No	No	No	No	Yes
T71	CID101253695	294.354	2.93762	86.3368	43.78	1	4	40	0	0.28	0	Passed	0.798759	0.833154	1	4.52	Soluble	Soluble	Soluble	High	-5.9	Yes	No	0.55	No	Yes	No	No	No	No	No	No	No	No	No	No	No	Yes	0	1	Yes	No	No	Yes	Yes
T72	CID101685340	357.45	0.7889	92.9866	77.84	2	5	53	0	0.81	0.48	Passed	0.626954	0.660751	1	5.82	Very soluble	Very soluble	Soluble	High	-8.66	No	No	0.55	Yes	Yes	No	No	No	No	No	No	No	No	No	No	No	Yes	0	1	No	No	No	No	No
T73	CID102067319	380.444	1.4211	101.123	62.24	1	5	52	0	0.59	0.27	Passed	0.747024	0.78363	1	5.37	Soluble	Soluble	Soluble	High	-7.35	No	No	0.55	No	No	No	No	No	No	No	No	No	Yes	No	No	No	Yes	0	1	No	No	Yes	No	No
T74	CID10523159	370.357	2.3229	92.2193	83.45	1	7	45	4	0.35	0.15	Passed	0.82715	0.766637	1	4.07	Soluble	Soluble	Moderately soluble	High	-7.19	No	No	0.55	No	Yes	Yes	No	Yes	No	Yes	No	Yes	Yes	No	Yes	Yes	Yes	0	0	Yes	No	Yes	No	Yes
T75	CID11537197	328.276	2.26852	83.2392	120.36	4	7	36	0	0.12	0.06	Passed	0.499353	0.456307	0	3.89	Soluble	Moderately soluble	Soluble	High	-6.86	No	No	0.55	No	Yes	No	Yes	Yes	No	No	No	No	Yes	No	Yes	No	Yes	0	0	No	No	No	Yes	Yes
T76	CID11982272	482.441	0.9905	116.386	162.98	5	10	57	3	0.36	0.28	Passed	0.39879	0.294092	1	5.88	Soluble	Soluble	Soluble	Low	-8.67	No	No	0.55	Yes	Yes	Yes	No	No	No	No	No	Yes	No	No	No	No	Yes	0	1	No	No	No	No	No
T77	CID12314414	424.497	1.9264	113.656	68.31	0	6	59	1	0.58	0.21	Passed	0.676164	0.69792	1	5.91	Soluble	Very soluble	Moderately soluble	High	-8.73	No	Yes	0.55	No	Yes	No	No	No	No	No	No	No	Yes	No	No	No	Yes	0	1	No	No	No	No	No
T78	CID13747828	370.357	2.3341	90.9558	75.61	1	7	45	2	0.4	0.2	Passed	0.86953	0.789844	1	4.22	Soluble	Soluble	Moderately soluble	High	-7.41	No	Yes	0.55	No	Yes	Yes	Yes	Yes	No	Yes	No	Yes	Yes	No	Yes	Yes	Yes	0	0	No	No	Yes	No	No
T79	CID14237664	438.476	4.1599	120.467	120.36	4	7	58	4	0.32	0.04	Passed	0.451509	0.42763	2	4.59	Moderately soluble	Poorly soluble	Moderately soluble	High	-5.71	No	No	0.55	No	No	No	No	No	No	Yes	Yes	Yes	No	No	No	Yes	Yes	0	1	Yes	Yes	No	Yes	Yes
T80	CID165547	357.454	2.0353	95.5402	65.64	1	4	53	2	0.7	0.25	Passed	0.822844	0.863871	1	4.21	Soluble	Soluble	Soluble	High	-7.09	Yes	No	0.55	No	No	No	No	No	No	No	No	No	Yes	No	No	No	Yes	0	0	Yes	No	No	No	No
T81	CID169996	306.27	1.037	73.8788	130.61	6	7	36	1	0.2	0.2	Passed	0.433876	0.414573	0	3.75	Soluble	Soluble	Soluble	High	-7.95	No	No	0.55	No	No	No	No	No	No	No	No	No	No	No	No	No	Yes	1	1	No	No	No	No	Yes
T82	CID185756	424.402	-0.6028	101.2	159.05	5	10	54	4	0.55	0.3	Passed	0.401095	0.288483	1	5.33	Soluble	Soluble	Soluble	Low	-8.91	No	No	0.55	No	No	No	No	No	No	No	No	No	No	No	No	No	Yes	0	1	No	No	No	No	No
T83	CID21123660	356.374	2.7425	87.578	82.81	0	6	46	1	0.55	0.25	Passed	0.719719	0.722646	1	5.7	Soluble	Soluble	Moderately soluble	High	-7.24	No	No	0.55	No	Yes	No	No	No	No	No	No	No	No	No	No	Yes	Yes	0	1	No	No	No	No	Yes
T84	CID21586648	357.362	0.4165	95.6012	112.15	4	7	45	3	0.32	0.05	Passed	0.505527	0.493692	1	3.45	Soluble	Soluble	Soluble	High	-7.62	No	No	0.55	Yes	Yes	Yes	No	No	No	No	No	No	No	No	No	No	Yes	0	1	Yes	No	No	No	Yes
T85	CID21629801	436.416	3.516	113.637	136.68	5	8	52	5	0.13	0.08	Passed	0.238071	0.266933	1	4.38	Moderately soluble	Moderately soluble	Moderately soluble	Low	-7.07	No	No	0.55	No	Yes	No	No	No	No	No	Yes	No	No	No	No	No	Yes	1	2	No	Yes	Yes	No	No
T86	CID21721881	334.28	1.20032	79.6513	147.68	6	8	38	1	0.19	0.13	Passed	0.426243	0.36643	0	3.66	Soluble	Soluble	Soluble	Low	-7.66	No	No	0.55	No	No	Yes	No	No	No	No	No	No	No	No	No	Yes	Yes	1	1	Yes	No	Yes	No	Yes
T87	CID21722946	368.341	2.3263	89.95	72.45	0	7	43	2	0.35	0.15	Passed	0.805494	0.744604	1	4.85	Soluble	Soluble	Moderately soluble	High	-7.16	Yes	Yes	0.55	No	Yes	Yes	No	Yes	No	Yes	Yes	Yes	Yes	No	Yes	Yes	Yes	0	0	No	No	Yes	No	No
T88	CID251890	364.445	2.1011	99.961	42.01	0	4	51	0	0.59	0.27	Passed	0.716024	0.774834	1	5.24	Soluble	Soluble	Soluble	High	-7.21	Yes	No	0.55	No	Yes	Yes	No	No	No	No	No	No	Yes	No	No	No	Yes	0	1	No	No	Yes	No	No
T89	CID325518	422.477	4.8552	117.321	96.22	3	6	57	3	0.32	0.04	Passed	0.611834	0.614851	2	4.64	Moderately soluble	Poorly soluble	Moderately soluble	High	-5.04	No	No	0.55	No	Yes	No	Yes	No	No	Yes	Yes	Yes	No	No	Yes	No	Yes	0	1	Yes	Yes	No	No	Yes
T90	CID438692	478.5	5.17864	132.452	115.06	4	6	58	1	0.13	0.07	Passed	0.299759	0.300957	2	4.29	Poorly soluble	Poorly soluble	Poorly soluble	Low	-4.62	No	No	0.55	No	No	No	No	Yes	Yes	Yes	Yes	Yes	No	Yes	No	No	Yes	0	0	Yes	No	No	Yes	Yes
T91	CID492901	348.31	3.6346	90.7495	63.22	0	6	38	1	0.15	0	Passed	0.6259	0.634523	1	2.96	Moderately soluble	Moderately soluble	Poorly soluble	High	-5.69	Yes	No	0.55	Yes	No	No	Yes	Yes	Yes	Yes	Yes	No	No	Yes	Yes	Yes	Yes	0	0	Yes	No	No	No	No
T92	CID5276454	442.376	2.5276	107.256	177.14	7	10	50	4	0.14	0.09	Passed	0.235487	0.191178	1	4.16	Soluble	Moderately soluble	Soluble	Low	-7.91	No	No	0.55	No	Yes	No	No	No	No	No	No	No	No	No	No	No	Yes	1	1	Yes	No	Yes	No	No
T93	CID5318717	418.354	0.3946	101.303	170.05	6	10	48	4	0.25	0.2	Passed	0.348366	0.240836	1	5	Soluble	Moderately soluble	Soluble	Low	-7.91	No	No	0.55	No	Yes	No	No	No	No	No	No	No	No	No	No	No	Yes	0	0	No	No	No	No	Yes
T94	CID5748205	432.381	0.0917	105.635	181.05	7	10	51	3	0.29	0.24	Passed	0.28026	0.198523	1	5.05	Soluble	Soluble	Soluble	Low	-9.19	No	No	0.55	No	No	No	No	No	No	No	No	No	No	No	No	No	Yes	1	1	No	No	No	No	Yes
T95	CID66868	310.36	4.6556	98.8574	57.36	2	2	38	0	0	0	Passed	0.437019	0.455674	1	6.24	Moderately soluble	Moderately soluble	Moderately soluble	High	-5.42	Yes	No	0.55	No	No	No	Yes	No	Yes	No	No	No	No	No	Yes	No	No	0	0	Yes	No	No	No	Yes
T96	CID91741938	340.375	3.4836	87.164	65.74	0	5	45	1	0.5	0.2	Passed	0.578285	0.681755	0	5.5	Soluble	Soluble	Moderately soluble	High	-6.56	Yes	No	0.55	No	No	No	No	No	Yes	No	No	No	No	No	Yes	Yes	Yes	0	2	No	No	No	No	Yes

## Sheet: Table S7
Table S7: ADMET properties of the top list of 9 potential phytochemical inhibitors of cathepsin L. For each phytochemical, the table gives the symbol, Pubchem identifier; several physicochemical properties such as Molecular weight in g/mol, LogP (Partition coefficient), MolarRefractivity, TPSA (Topological Surface Area) in Å², Number of hydrogen bond acceptors, Number of hydrogen bond donors, Tot…
Phytochemical symbol	PubChem identifier	Physicochemical properties										Drug-likeness properties					Absorption and Distribution								Metabolism														Toxicity
		Molecular weight (g/mol)	LogP	Molar Refractivity	TPSA (Å²)	Number of hydrogen bond donors	Number of hydrogen bond acceptors	Total number of Atoms	Number of rotatable bonds	Shape complexity	Stereochemical complexity	Lipinski RO5 filter	QEDw	QEDuw	Leadlikeness, number of violations predicted by SwissADME	Synthetic accessibility predicted by SwissADME	Solubility class predicted by SwissADME using ESOL method	Solubility class predicted by SwissADME using method by Ali et al	Solubility class predicted by SwissADME using Silicos-IT	Gasterointestinal absorption predicted by SwissADME	Skin permeation predicted by SwissADME (log Kp cm/s)	Blood Brain Barrier permeation predicted by SwissADME	Blood Brain Barrier permeation predicted by vNNADMET	Bioavailability Score predicted by SwissADME	P-glycoprotein substrate predicted by SwissADME	P-glycoprotein substrate predicted by vNNADMET	P-glycoprotein inhibitor predicted by vNNADMET	Cytochrome P450 1A2 inhibitor predicted by SwissADME	Cytochrome P450 1A2 inhibitor predicted by vNNADMET	Cytochrome P450 2C19 inhibitor predicted by SwissADME	Cytochrome P450 2C19 inhibitor predicted by vNNADMET	Cytochrome P450 2C9 inhibitor predicted by SwissADME	Cytochrome P450 2C9 inhibitor predicted by vNNADMET	Cytochrome P450 2D6 inhibitor predicted by SwissADME	Cytochrome P450 2D6 inhibitor predicted by vNNADMET	Cytochrome P450 3A4 inhibitor predicted by SwissADME	Cytochrome P450 3A4 inhibitor predicted by vNNADMET	Human liver microsomal stability predicted by vNNADMET (HLM)	PAINS:Number of alerts predicted by SwissADME	Brenk:Number of alerts predicted by SwissADME	Drug-induced liver injury predicted by vNNADMET (DILI)	Cytotoxicity predicted by vNNADMET	hERG Blocker predicted by vNNADMET	Mitochondrial toxicity predicted by vNNADMET (MMP)	Mutagenecity predicted by vNNADMET (AMES)
C1	CID438692	478.5	5.17864	132.452	115.06	4	6	58	1	0.13	0.07	Passed	0.299759	0.300957	2	4.29	Poorly soluble	Poorly soluble	Poorly soluble	Low	-4.62	No	No	0.55	No	No	No	No	Yes	Yes	Yes	Yes	Yes	No	Yes	No	No	Yes	0	0	Yes	No	No	Yes	Yes
C2	CID189308	379.324	2.0573	93.5705	83.53	0	8	41	0	0.2	0.05	Passed	0.390794	0.45811	1	4.39	Moderately soluble	Moderately soluble	Moderately soluble	High	-6.49	No	No	0.55	No	No	Yes	Yes	No	Yes	Yes	Yes	No	Yes	No	Yes	Yes	Yes	0	2	Yes	No	No	No	Yes
C3	CID76326662	466.629	5.6562	142.026	56.08	3	3	69	4	0.4	0.13	Passed	0.340466	0.383683	2	4.89	Moderately soluble	Moderately soluble	Poorly soluble	High	-5.67	Yes	No	0.55	No	Yes	No	No	No	No	No	No	No	No	No	No	No	No	1	1	No	No	No	No	No
C4	CID102151885	621.738	3.5257	176.259	116	3	6	85	5	0.31	0.11	Passed	0.291026	0.30654	3	6.82	Poorly soluble	Poorly soluble	Poorly soluble	High	-6.81	No	Yes	0.55	Yes	Yes	Yes	No	No	Yes	No	Yes	No	Yes	No	Yes	Yes	Yes	0	0	No	No	Yes	No	Yes
C5	CID442120	532.512	2.302	142.287	148.22	4	6	60	2	0.13	0.07	Passed	0.318319	0.298695	1	5.37	Moderately soluble	Moderately soluble	Moderately soluble	Low	-7.92	No	Yes	0.56	Yes	No	No	No	No	No	No	Yes	No	No	No	No	No	Yes	0	0	Yes	No	Yes	No	No
C6	CID161453	450.534	7.4396	137.702	58.92	2	4	60	1	0.2	0	Passed	0.316353	0.331436	2	4.4	Poorly soluble	Poorly soluble	Poorly soluble	Low	-3.95	No	Yes	0.55	No	Yes	Yes	No	No	Yes	Yes	No	No	No	No	No	No	Yes	0	0	Yes	No	No	No	Yes
C7	CID42608131	466.442	2.0197	114.997	142.75	4	9	56	3	0.36	0.24	Passed	0.499714	0.400671	1	5.71	Soluble	Soluble	Soluble	Low	-8.18	No	No	0.55	No	Yes	No	No	No	No	No	No	No	No	No	No	No	Yes	0	1	No	No	No	No	No
C8	CID5320555	490.519	4.4464	143.649	90.62	1	7	59	5	0.14	0	Passed	0.360295	0.379932	2	3.49	Moderately soluble	Moderately soluble	Poorly soluble	High	-6.21	No	No	0.55	Yes	Yes	Yes	No	No	Yes	No	Yes	No	No	No	Yes	Yes	Yes	0	1	Yes	No	Yes	No	Yes
C9	CID90473021	516.417	2.1972	147.65	163.11	3	9	51	0	0	0	Passed	0.202526	0.175637	2	2.58	Poorly soluble	Poorly soluble	Poorly soluble	Low	-5.33	No	No	0.55	No	No	Yes	No	Yes	No	Yes	No	No	No	No	Yes	No	Yes	0	2	No	No	No	Yes	Yes
